# Supplementary material for: Diverse microbial communities hosted by the model carnivorous pitcher plant Sarracenia purpurea : analysis of both bacterial and eukaryotic composition across distinct host plant populations
Source: PeerJ journal article supplement (doi:10.7717/peerj.6392), 2019-02-18
Supplement: 16S_Genera_Level_OCt16.pdf [file 16S_Genera_Level_OCt16.pdf]

**Table S1.** Bacterial OTUs from 16S rRNA sequencing analysis including only taxa which were identified to genus level (those OTUs identified as Ambiguous taxa, uncultured bacteria or without genus-level identifications were omitted). OTUs with only a single representative across all samples were also omitted. Taxa are listed from most to least abundant.

| Class               | Order              | Family              | Genus                    | Pitcher Plant Sample |       |       |       |         |       |       |       |        |         | sum   |
|---------------------|--------------------|---------------------|--------------------------|----------------------|-------|-------|-------|---------|-------|-------|-------|--------|---------|-------|
|                     |                    |                     |                          | CB1p1                | CB1p2 | CB1p3 | CB1p4 | CB5p234 | Sp3p2 | Sp3p4 | Sp3p5 | Sp5p23 | Sp9p234 |       |
| Gammaproteobacteria | Legionellales      | Coxiellaceae        | <i>Rickettsiella</i>     | 1                    | 2     | 0     | 1     | 2       | 3     | 60194 | 497   | 1038   | 2       | 61740 |
| Alphaproteobacteria | Rhodospirillales   | Rhodospirillaceae   | <i>Azospirillum</i>      | 686                  | 527   | 10513 | 485   | 11      | 3     | 2     | 7     | 16494  | 8201    | 36929 |
| Sphingobacteriia    | Sphingobacteriales | Sphingobacteriaceae | <i>Pedobacter</i>        | 455                  | 302   | 873   | 103   | 16      | 19242 | 279   | 55    | 760    | 1077    | 23162 |
| Betaproteobacteria  | Burkholderiales    | Oxalobacteraceae    | <i>Duganella</i>         | 9060                 | 5734  | 2660  | 40    | 1357    | 280   | 117   | 29    | 129    | 35      | 19441 |
| Gammaproteobacteria | Pseudomonadales    | Pseudomonadaceae    | <i>Pseudomonas</i>       | 3336                 | 1991  | 3475  | 1309  | 2819    | 233   | 1335  | 1666  | 3046   | 218     | 19428 |
| Betaproteobacteria  | Burkholderiales    | Burkholderiaceae    | <i>Paraburkholderia</i>  | 0                    | 1     | 0     | 1     | 16051   | 98    | 41    | 140   | 23     | 17      | 16372 |
| Sphingobacteriia    | Sphingobacteriales | Sphingobacteriaceae | <i>Mucilaginibacter</i>  | 77                   | 39    | 3123  | 20    | 2006    | 324   | 982   | 5764  | 408    | 21      | 12764 |
| Gammaproteobacteria | Pseudomonadales    | Moraxellaceae       | <i>Alkanindiges</i>      | 9                    | 10    | 14    | 7     | 9632    | 6     | 79    | 518   | 1183   | 65      | 11523 |
| Betaproteobacteria  | Neisseriales       | Neisseriaceae       | <i>Aquitalea</i>         | 0                    | 0     | 0     | 0     | 1       | 1577  | 5715  | 1471  | 2141   | 177     | 11082 |
| Flavobacteriia      | Flavobacteriales   | Flavobacteriaceae   | <i>Flavobacterium</i>    | 324                  | 219   | 8432  | 533   | 24      | 123   | 7     | 15    | 111    | 324     | 10112 |
| Alphaproteobacteria | Sphingomonadales   | Sphingomonadaceae   | <i>Sphingomonas</i>      | 633                  | 514   | 717   | 498   | 337     | 1563  | 1451  | 1269  | 921    | 864     | 8767  |
| Gammaproteobacteria | Xanthomonadales    | Xanthomonadaceae    | <i>Rhodanobacter</i>     | 6                    | 8     | 2     | 23    | 6284    | 1     | 1198  | 781   | 77     | 26      | 8406  |
| Actinobacteria      | Corynebacteriales  | Mycobacteriaceae    | <i>Mycobacterium</i>     | 1321                 | 943   | 2534  | 137   | 865     | 8     | 95    | 506   | 1294   | 297     | 8000  |
| Negativicutes       | Selenomonadales    | Veillonellaceae     | <i>Pelosinus</i>         | 18                   | 11    | 125   | 1     | 4958    | 127   | 936   | 2     | 786    | 144     | 7108  |
| Alphaproteobacteria | Rhizobiales        | Rhizobiaceae        | <i>Kaistia</i>           | 218                  | 214   | 2417  | 374   | 464     | 44    | 97    | 249   | 1629   | 563     | 6269  |
| Gammaproteobacteria | Xanthomonadales    | Xanthomonadaceae    | <i>Tahibacter</i>        | 3642                 | 2319  | 25    | 2     | 0       | 3     | 1     | 0     | 0      | 1       | 5993  |
| Actinobacteria      | Corynebacteriales  | Nocardiaceae        | <i>Rhodococcus</i>       | 1073                 | 885   | 735   | 2821  | 32      | 2     | 1     | 0     | 10     | 0       | 5559  |
| Alphaproteobacteria | Sphingomonadales   | Sphingomonadaceae   | <i>Novosphingobium</i>   | 27                   | 32    | 10    | 4     | 58      | 8     | 215   | 4203  | 522    | 10      | 5089  |
| Actinobacteria      | Micrococcales      | Microbacteriaceae   | <i>Leifsonia</i>         | 47                   | 33    | 31    | 52    | 956     | 0     | 807   | 2294  | 532    | 157     | 4909  |
| Betaproteobacteria  | Rhodocyclales      | Rhodocyclaceae      | <i>Denitratisona</i>     | 48                   | 33    | 3746  | 0     | 94      | 35    | 1     | 8     | 42     | 0       | 4007  |
| Flavobacteriia      | Flavobacteriales   | Flavobacteriaceae   | <i>Chryseobacterium</i>  | 14                   | 1     | 47    | 2     | 21      | 3685  | 28    | 27    | 7      | 3       | 3835  |
| Actinobacteria      | Micrococcales      | Cellulomonadaceae   | <i>Oerskovia</i>         | 1143                 | 636   | 30    | 1948  | 6       | 0     | 0     | 2     | 9      | 0       | 3774  |
| Alphaproteobacteria | Rhizobiales        | Bradyrhizobiaceae   | <i>Rhodopseudomonas</i>  | 1082                 | 896   | 174   | 273   | 8       | 2     | 0     | 0     | 0      | 1230    | 3665  |
| Betaproteobacteria  | Burkholderiales    | Comamonadaceae      | <i>Delftia</i>           | 23                   | 25    | 220   | 1     | 149     | 878   | 8     | 10    | 346    | 1677    | 3337  |
| Verrucomicrobiae    | Verrucomicrobiales | Verrucomicrobiaceae | <i>Prostheco bacter</i>  | 45                   | 46    | 41    | 31    | 6       | 0     | 0     | 0     | 90     | 2964    | 3223  |
| Gammaproteobacteria | Aeromonadales      | Aeromonadaceae      | <i>Aeromonas</i>         | 49                   | 24    | 3049  | 6     | 16      | 0     | 0     | 0     | 1      | 3       | 3148  |
| Betaproteobacteria  | Burkholderiales    | Comamonadaceae      | <i>Variovorax</i>        | 776                  | 506   | 61    | 167   | 284     | 507   | 152   | 257   | 85     | 68      | 2863  |
| Gemmatimonadetes    | Gemmatimonadales   | Gemmatimonadaceae   | <i>Gemmatimonas</i>      | 1289                 | 1148  | 19    | 234   | 0       | 0     | 1     | 0     | 0      | 0       | 2691  |
| Acidobacteria       | Acidobacteriales   | Acidobacteriaceae   | <i>Terriglobus</i>       | 1                    | 0     | 0     | 0     | 823     | 3     | 704   | 984   | 54     | 73      | 2642  |
| Gammaproteobacteria | Enterobacteriales  | Enterobacteriaceae  | <i>Serratia</i>          | 2                    | 0     | 7     | 1     | 2100    | 126   | 87    | 159   | 109    | 38      | 2629  |
| Betaproteobacteria  | Burkholderiales    | Oxalobacteraceae    | <i>Janthinobacterium</i> | 1073                 | 925   | 220   | 8     | 187     | 13    | 48    | 21    | 18     | 0       | 2513  |

|                     |                     |                     |                         |     |     |      |      |     |      |     |     |      |     |      |
|---------------------|---------------------|---------------------|-------------------------|-----|-----|------|------|-----|------|-----|-----|------|-----|------|
| Actinobacteria      | Corynebacteriales   | Nocardiaceae        | <i>Gordonia</i>         | 30  | 21  | 320  | 688  | 33  | 30   | 260 | 109 | 516  | 481 | 2488 |
| Deltaproteobacteria | Bdellovibrionales   | Bacteriovoraceae    | <i>Bacteriovorax</i>    | 73  | 50  | 197  | 26   | 0   | 331  | 4   | 1   | 1442 | 36  | 2160 |
| Acidobacteria       | Acidobacteriales    | Acidobacteriaceae   | <i>Granulicella</i>     | 0   | 0   | 0    | 0    | 350 | 0    | 503 | 895 | 194  | 0   | 1942 |
| Gammaproteobacteria | Cellvibrionales     | Cellvibrionaceae    | <i>Cellvibrio</i>       | 998 | 660 | 21   | 215  | 2   | 0    | 0   | 0   | 26   | 0   | 1922 |
| Betaproteobacteria  | Burkholderiales     | Oxalobacteraceae    | <i>Massilia</i>         | 157 | 174 | 676  | 2    | 126 | 211  | 9   | 13  | 425  | 13  | 1806 |
| Actinobacteria      | Micrococcales       | Cellulomonadaceae   | <i>Cellulomonas</i>     | 262 | 228 | 177  | 1023 | 0   | 0    | 0   | 0   | 0    | 0   | 1690 |
| Betaproteobacteria  | Burkholderiales     | Oxalobacteraceae    | <i>Undibacterium</i>    | 42  | 19  | 773  | 0    | 58  | 48   | 10  | 329 | 295  | 30  | 1604 |
| Alphaproteobacteria | Rhizobiales         | Rhizobiaceae        | <i>Rhizobium</i>        | 43  | 26  | 92   | 39   | 96  | 674  | 117 | 57  | 255  | 204 | 1603 |
| Sphingobacteriia    | Sphingobacteriales  | Chitinophagaceae    | <i>Ferruginibacter</i>  | 0   | 1   | 16   | 18   | 134 | 0    | 861 | 24  | 338  | 171 | 1563 |
| Betaproteobacteria  | Burkholderiales     | Comamonadaceae      | <i>Acidovorax</i>       | 529 | 265 | 369  | 23   | 107 | 70   | 37  | 16  | 50   | 42  | 1508 |
| Betaproteobacteria  | Burkholderiales     | Comamonadaceae      | <i>Rhizobacter</i>      | 28  | 25  | 13   | 0    | 67  | 26   | 13  | 126 | 245  | 955 | 1498 |
| Alphaproteobacteria | Sphingomonadales    | Sphingomonadaceae   | <i>Sphingopyxis</i>     | 630 | 440 | 57   | 89   | 15  | 2    | 5   | 125 | 98   | 34  | 1495 |
| Clostridia          | Clostridiales       | Clostridiaceae      | <i>Clostridium</i>      | 14  | 256 | 12   | 1105 | 0   | 0    | 30  | 2   | 3    | 49  | 1471 |
| Actinobacteria      | Micrococcales       | Microbacteriaceae   | <i>Salinibacterium</i>  | 441 | 282 | 53   | 198  | 14  | 134  | 29  | 111 | 89   | 89  | 1440 |
| Alphaproteobacteria | Rhodospirillales    | Rhodospirillaceae   | <i>Ferrovibrio</i>      | 136 | 127 | 1150 | 5    | 0   | 0    | 0   | 0   | 0    | 0   | 1418 |
| Betaproteobacteria  | Burkholderiales     | Comamonadaceae      | <i>Hydrogenophaga</i>   | 751 | 460 | 95   | 102  | 0   | 0    | 1   | 0   | 0    | 5   | 1414 |
| Alphaproteobacteria | Caulobacterales     | Caulobacteraceae    | <i>Phenylobacterium</i> | 437 | 352 | 21   | 85   | 176 | 0    | 2   | 21  | 246  | 41  | 1381 |
| Negativicutes       | Selenomonadales     | Veillonellaceae     | <i>Anaerospira</i>      | 18  | 10  | 463  | 1    | 4   | 1    | 5   | 0   | 112  | 746 | 1360 |
| Alphaproteobacteria | Rhodobacterales     | Rhodobacteraceae    | <i>Rhodovulum</i>       | 671 | 461 | 43   | 121  | 5   | 0    | 1   | 1   | 13   | 11  | 1327 |
| Acidimicrobiia      | Acidimicrobiales    | Iamiaceae           | <i>Iamia</i>            | 563 | 454 | 72   | 106  | 8   | 0    | 0   | 1   | 116  | 0   | 1320 |
| Alphaproteobacteria | Sphingomonadales    | Kiloniellaceae      | <i>Kiloniella</i>       | 0   | 0   | 0    | 0    | 0   | 173  | 506 | 500 | 103  | 15  | 1297 |
| Gammaproteobacteria | Enterobacteriales   | Enterobacteriaceae  | <i>Morganella</i>       | 0   | 0   | 0    | 0    | 0   | 1072 | 0   | 6   | 187  | 27  | 1292 |
| Alphaproteobacteria | Caulobacterales     | Caulobacteraceae    | <i>Caulobacter</i>      | 19  | 16  | 5    | 367  | 17  | 15   | 15  | 16  | 715  | 21  | 1206 |
| Alphaproteobacteria | Rhizobiales         | Rhizobiales IS      | <i>Rhizomicrobium</i>   | 58  | 37  | 157  | 19   | 400 | 0    | 3   | 79  | 450  | 2   | 1205 |
| Alphaproteobacteria | Rhizobiales         | Hyphomicrobiaceae   | <i>Devosia</i>          | 415 | 310 | 174  | 247  | 13  | 1    | 0   | 0   | 0    | 14  | 1174 |
| Alphaproteobacteria | Sphingomonadales    | Sphingomonadaceae   | <i>Polymorphobacter</i> | 549 | 395 | 140  | 0    | 3   | 0    | 0   | 0   | 0    | 14  | 1101 |
| Betaproteobacteria  | Burkholderiales     | Burkholderiaceae    | <i>Chitinimonas</i>     | 0   | 1   | 0    | 0    | 0   | 0    | 0   | 0   | 1065 | 0   | 1066 |
| Alphaproteobacteria | Rhizobiales         | Bradyrhizobiaceae   | <i>Bosea</i>            | 75  | 60  | 150  | 48   | 0   | 217  | 42  | 7   | 40   | 370 | 1009 |
| Alphaproteobacteria | Caulobacterales     | Caulobacteraceae    | <i>Asticcacaulis</i>    | 18  | 4   | 62   | 0    | 63  | 3    | 108 | 415 | 225  | 71  | 969  |
| Thermoleophilia     | Solirubrobacterales | Patulibacteraceae   | <i>Patulibacter</i>     | 421 | 186 | 335  | 10   | 0   | 1    | 0   | 0   | 0    | 0   | 953  |
| Verrucomicrobiae    | Verrucomicrobiales  | Verrucomicrobiaceae | <i>Verrucomicrobium</i> | 450 | 410 | 36   | 43   | 0   | 0    | 0   | 0   | 0    | 0   | 939  |
| Alphaproteobacteria | Caulobacterales     | Caulobacteraceae    | <i>Brevundimonas</i>    | 218 | 201 | 237  | 196  | 10  | 61   | 0   | 3   | 0    | 12  | 938  |
| Betaproteobacteria  | Burkholderiales     | Comamonadaceae      | <i>Aquabacterium</i>    | 151 | 84  | 85   | 13   | 12  | 1    | 0   | 15  | 429  | 0   | 790  |
| Deltaproteobacteria | Bdellovibrionales   | Bdellovibrionaceae  | <i>Bdellovibrio</i>     | 158 | 87  | 87   | 344  | 3   | 8    | 8   | 5   | 5    | 55  | 760  |
| Alphaproteobacteria | Sphingomonadales    | Sphingomonadaceae   | <i>Sphingobium</i>      | 218 | 156 | 36   | 17   | 70  | 108  | 1   | 12  | 95   | 43  | 756  |
| Alphaproteobacteria | Rhodospirillales    | Acetobacteraceae    | <i>Roseococcus</i>      | 339 | 154 | 41   | 182  | 18  | 0    | 0   | 1   | 1    | 2   | 738  |

|                     |                     |                         |                          |     |     |     |     |     |     |    |     |     |     |     |
|---------------------|---------------------|-------------------------|--------------------------|-----|-----|-----|-----|-----|-----|----|-----|-----|-----|-----|
| Clostridia          | Clostridiales       | Gracilibacteraceae      | <i>Lutispora</i>         | 175 | 110 | 63  | 20  | 0   | 0   | 0  | 0   | 4   | 300 | 672 |
| Negativicutes       | Selenomonadales     | Veillonellaceae         | <i>Sporomusa</i>         | 25  | 21  | 119 | 12  | 0   | 0   | 0  | 0   | 41  | 441 | 659 |
| Actinobacteria      | Frankiales          | Cryptosporangiaceae     | <i>Fodinicola</i>        | 352 | 266 | 4   | 27  | 0   | 0   | 0  | 0   | 0   | 0   | 649 |
| Gammaproteobacteria | Xanthomonadales     | Xanthomonadaceae        | <i>Stenotrophomonas</i>  | 149 | 78  | 315 | 55  | 1   | 4   | 0  | 1   | 0   | 1   | 604 |
| Cytophagia          | Cytophagales        | Cytophagaceae           | <i>Cytophaga</i>         | 78  | 36  | 129 | 52  | 0   | 0   | 0  | 33  | 270 | 0   | 598 |
| Actinobacteria      | Micrococcales       | Sanguibacteraceae       | <i>Sanguibacter</i>      | 230 | 177 | 15  | 134 | 6   | 0   | 0  | 2   | 23  | 0   | 587 |
| Betaproteobacteria  | Burkholderiales     | Comamonadaceae          | <i>Polaromonas</i>       | 189 | 145 | 137 | 95  | 1   | 2   | 0  | 3   | 0   | 8   | 580 |
| Betaproteobacteria  | Burkholderiales     | Comamonadaceae          | <i>Comamonas</i>         | 358 | 183 | 9   | 0   | 3   | 3   | 0  | 0   | 0   | 16  | 572 |
| Alphaproteobacteria | Rhizobiales         | Phyllobacteriaceae      | <i>Mesorhizobium</i>     | 15  | 14  | 46  | 86  | 172 | 16  | 20 | 78  | 24  | 75  | 546 |
| Actinobacteria      | Propionibacteriales | Nocardioideaceae        | <i>Aeromicrobium</i>     | 340 | 190 | 0   | 9   | 0   | 0   | 0  | 0   | 0   | 0   | 539 |
| Gammaproteobacteria | Legionellales       | Legionellaceae          | <i>Legionella</i>        | 9   | 1   | 164 | 0   | 26  | 0   | 0  | 235 | 76  | 0   | 511 |
| Flavobacteriia      | Flavobacteriales    | Cryomorphaceae          | <i>Fluviicola</i>        | 2   | 1   | 8   | 3   | 0   | 0   | 0  | 0   | 0   | 460 | 474 |
| Bacilli             | Bacillales          | Paenibacillaceae        | <i>Paenibacillus</i>     | 95  | 68  | 98  | 0   | 5   | 7   | 3  | 1   | 79  | 115 | 471 |
| Clostridia          | Clostridiales       | Clostridiales Family XI | <i>Sedimentibacter</i>   | 43  | 24  | 45  | 7   | 0   | 0   | 0  | 0   | 0   | 321 | 440 |
| Cytophagia          | Cytophagales        | Cytophagaceae           | <i>Dyadobacter</i>       | 176 | 75  | 133 | 8   | 0   | 0   | 1  | 0   | 4   | 40  | 437 |
| Flavobacteriia      | Flavobacteriales    | Flavobacteriaceae       | <i>Epilithonimonas</i>   | 6   | 10  | 74  | 0   | 0   | 96  | 63 | 5   | 33  | 145 | 432 |
| Deltaproteobacteria | Myxococcales        | Polyangiaceae           | <i>Sorangium</i>         | 161 | 134 | 9   | 73  | 0   | 3   | 0  | 1   | 47  | 0   | 428 |
| Sphingobacteriia    | Sphingobacteriales  | Chitinophagaceae        | <i>Taibaiella</i>        | 163 | 79  | 28  | 21  | 0   | 0   | 50 | 2   | 46  | 38  | 427 |
| Clostridia          | Clostridiales       | Lachnospiraceae         | <i>Lachnoclostridium</i> | 14  | 9   | 5   | 358 | 0   | 0   | 6  | 5   | 0   | 26  | 423 |
| Alphaproteobacteria | Rhodospirillales    | Rhodospirillaceae       | <i>Skermanella</i>       | 0   | 0   | 6   | 0   | 0   | 0   | 1  | 5   | 398 | 0   | 410 |
| Alphaproteobacteria | Rhizobiales         | Rhizobiales IS          | <i>Bauldia</i>           | 179 | 161 | 52  | 10  | 0   | 0   | 0  | 0   | 1   | 0   | 403 |
| Acidimicrobiia      | Acidimicrobiales    | Acidimicrobiales        | <i>Microthrix</i>        | 33  | 25  | 103 | 211 | 3   | 0   | 1  | 0   | 15  | 0   | 391 |
| Opitutae            | Opitutales          | Opitutaceae             | <i>Opitutus</i>          | 67  | 47  | 93  | 13  | 36  | 0   | 8  | 0   | 115 | 2   | 381 |
| Alphaproteobacteria | Rhodospirillales    | Acetobacteraceae        | <i>Roseomonas</i>        | 17  | 28  | 98  | 218 | 8   | 0   | 0  | 0   | 0   | 2   | 371 |
| Alphaproteobacteria | Rhodospirillales    | Rhodospirillaceae       | <i>Inquilinus</i>        | 10  | 0   | 3   | 0   | 288 | 0   | 0  | 2   | 67  | 0   | 370 |
| Alphaproteobacteria | Rhizobiales         | Bradyrhizobiaceae       | <i>Rhodoblastus</i>      | 8   | 7   | 0   | 40  | 0   | 0   | 2  | 7   | 65  | 240 | 369 |
| Betaproteobacteria  | Neisseriales        | Neisseriaceae           | <i>Deefgea</i>           | 45  | 50  | 213 | 26  | 0   | 0   | 0  | 0   | 18  | 0   | 352 |
| Gammaproteobacteria | Thiotrichales       | Thiotrichales           | <i>Endoecteinascidia</i> | 0   | 0   | 0   | 0   | 0   | 0   | 0  | 0   | 340 | 0   | 340 |
| Betaproteobacteria  | Burkholderiales     | Oxalobacteraceae        | <i>Hermiimonas</i>       | 1   | 0   | 1   | 8   | 290 | 0   | 0  | 20  | 7   | 0   | 327 |
| Sphingobacteriia    | Sphingobacteriales  | Chitinophagaceae        | <i>Sediminibacterium</i> | 0   | 0   | 0   | 0   | 22  | 0   | 48 | 29  | 221 | 0   | 320 |
| Betaproteobacteria  | Neisseriales        | Neisseriaceae           | <i>Paludibacterium</i>   | 0   | 0   | 0   | 0   | 0   | 0   | 0  | 158 | 156 | 0   | 314 |
| Spartobacteria      | Chthoniobacterales  | Chthoniobacteraceae     | <i>Chthoniobacter</i>    | 3   | 4   | 72  | 234 | 0   | 0   | 0  | 0   | 0   | 0   | 313 |
| Alphaproteobacteria | Rhizobiales         | Bradyrhizobiaceae       | <i>Nitrobacter</i>       | 83  | 46  | 36  | 4   | 27  | 0   | 10 | 6   | 36  | 51  | 299 |
| Clostridia          | Clostridiales       | Ruminococcaceae         | <i>Ruminiclostridium</i> | 137 | 19  | 1   | 0   | 0   | 31  | 0  | 76  | 14  | 3   | 281 |
| Actinobacteria      | Micrococcales       | Microbacteriaceae       | <i>Leucobacter</i>       | 70  | 45  | 17  | 107 | 10  | 0   | 2  | 2   | 0   | 0   | 253 |
| Bacilli             | Lactobacillales     | Enterococcaceae         | <i>Enterococcus</i>      | 16  | 3   | 0   | 0   | 0   | 110 | 0  | 5   | 115 | 0   | 249 |

|                     |                    |                       |                              |     |    |     |     |     |     |    |     |    |     |     |
|---------------------|--------------------|-----------------------|------------------------------|-----|----|-----|-----|-----|-----|----|-----|----|-----|-----|
| Gammaproteobacteria | Enterobacteriales  | Enterobacteriaceae    | <i>Pantoea</i>               | 0   | 0  | 0   | 0   | 0   | 236 | 4  | 0   | 1  | 1   | 242 |
| Verrucomicrobiae    | Verrucomicrobiales | Verrucomicrobiaceae   | <i>Brevifollis</i>           | 10  | 2  | 220 | 1   | 0   | 0   | 0  | 0   | 0  | 0   | 233 |
| Cytophagia          | Cytophagales       | Cytophagaceae         | <i>Emticicia</i>             | 54  | 21 | 0   | 148 | 2   | 0   | 0  | 0   | 0  | 0   | 225 |
| Betaproteobacteria  | Burkholderiales    | Comamonadaceae        | <i>Simplicispira</i>         | 1   | 5  | 45  | 4   | 9   | 64  | 31 | 13  | 2  | 40  | 214 |
| Betaproteobacteria  | Methylophilales    | Methylophilaceae      | <i>OM43</i>                  | 60  | 31 | 73  | 3   | 0   | 0   | 0  | 0   | 0  | 40  | 207 |
| Gammaproteobacteria | Xanthomonadales    | Xanthomonadaceae      | <i>Luteimonas</i>            | 99  | 72 | 3   | 29  | 0   | 0   | 0  | 0   | 0  | 0   | 203 |
| Sphingobacteriia    | Sphingobacteriales | Chitinophagaceae      | <i>Chitinophaga</i>          | 1   | 2  | 22  | 0   | 1   | 0   | 1  | 0   | 8  | 166 | 201 |
| Gammaproteobacteria | Pseudomonadales    | Moraxellaceae         | <i>Acinetobacter</i>         | 36  | 41 | 4   | 1   | 104 | 3   | 1  | 1   | 7  | 0   | 198 |
| Gammaproteobacteria | Pseudomonadales    | Moraxellaceae         | <i>Perlucidibaca</i>         | 0   | 1  | 52  | 1   | 15  | 0   | 0  | 89  | 15 | 21  | 194 |
| Cytophagia          | Cytophagales       | Cytophagaceae         | <i>Persicitalea</i>          | 120 | 71 | 0   | 0   | 0   | 0   | 0  | 0   | 0  | 0   | 191 |
| Betaproteobacteria  | Burkholderiales    | Burkholderiaceae      | <i>Ralstonia</i>             | 18  | 5  | 2   | 3   | 116 | 8   | 3  | 13  | 14 | 7   | 189 |
| Alphaproteobacteria | Caulobacterales    | Hyphomonadaceae       | <i>Hirschia</i>              | 11  | 22 | 11  | 140 | 0   | 0   | 0  | 0   | 3  | 0   | 187 |
| Clostridia          | Clostridiales      | Lachnospiraceae       | <i>Mobilitalea</i>           | 16  | 34 | 27  | 4   | 0   | 0   | 0  | 0   | 0  | 104 | 185 |
| Betaproteobacteria  | Burkholderiales    | Burkholderiaceae      | <i>Limnobacter</i>           | 0   | 0  | 1   | 0   | 81  | 0   | 4  | 25  | 66 | 8   | 185 |
| Alphaproteobacteria | Rhodospirillales   | Rhodospirillales IS   | <i>Reyranela</i>             | 10  | 2  | 137 | 5   | 10  | 0   | 0  | 0   | 11 | 0   | 175 |
| Sphingobacteriia    | Sphingobacteriales | Sphingobacteriaceae   | <i>Sphingobacterium</i>      | 80  | 38 | 3   | 4   | 0   | 0   | 0  | 0   | 0  | 28  | 153 |
| Betaproteobacteria  | Neisseriales       | Neisseriaceae         | <i>Chromobacterium</i>       | 0   | 0  | 0   | 0   | 0   | 3   | 98 | 17  | 10 | 21  | 149 |
| Clostridia          | Clostridiales      | Ruminococcaceae       | <i>Anaerobacterium</i>       | 2   | 3  | 143 | 0   | 0   | 0   | 0  | 0   | 0  | 0   | 148 |
| Alphaproteobacteria | Rhizobiales        | Bradyrhizobiaceae     | <i>Bradyrhizobium</i>        | 21  | 15 | 2   | 1   | 54  | 1   | 6  | 10  | 9  | 27  | 146 |
| Alphaproteobacteria | Rhizobiales        | Methylobacteriaceae   | <i>Methylobacterium</i>      | 21  | 4  | 5   | 2   | 99  | 8   | 0  | 3   | 0  | 0   | 142 |
| Gammaproteobacteria | Xanthomonadales    | Xanthomonadaceae      | <i>Arenimonas</i>            | 0   | 0  | 5   | 136 | 0   | 0   | 0  | 0   | 0  | 0   | 141 |
| Alphaproteobacteria | Rhodospirillales   | Acetobacteraceae      | <i>Acidisoma</i>             | 0   | 0  | 0   | 0   | 0   | 0   | 19 | 117 | 2  | 0   | 138 |
| Alphaproteobacteria | Rickettsiales      | Rickettsiales         | <i>Captivus</i>              | 0   | 0  | 0   | 0   | 51  | 0   | 0  | 0   | 84 | 0   | 135 |
| Alphaproteobacteria | Rickettsiales      | Rickettsiales         | <i>Hepatincola</i>           | 12  | 7  | 29  | 4   | 0   | 5   | 34 | 24  | 0  | 17  | 132 |
| Bacteroidia         | Bacteroidales      | Porphyromonadaceae    | <i>Dysgonomonas</i>          | 25  | 11 | 21  | 4   | 0   | 1   | 2  | 2   | 16 | 46  | 128 |
| Sphingobacteriia    | Sphingobacteriales | Chitinophagaceae      | <i>Heliimonas</i>            | 0   | 0  | 0   | 0   | 60  | 0   | 54 | 6   | 6  | 0   | 126 |
| Betaproteobacteria  | Burkholderiales    | Oxalobacteraceae      | <i>Herbaspirillum</i>        | 1   | 0  | 2   | 0   | 119 | 0   | 0  | 0   | 2  | 0   | 124 |
| Spartobacteria      | Chthoniobacterales | Chthoniobacterales IS | <i>Terrimicrobium</i>        | 5   | 10 | 105 | 2   | 0   | 0   | 0  | 0   | 0  | 0   | 122 |
| Alphaproteobacteria | Sphingomonadales   | Erythrobacteraceae    | <i>Erythrobacter</i>         | 0   | 0  | 0   | 0   | 0   | 0   | 3  | 110 | 1  | 0   | 114 |
| Bacilli             | Bacillales         | Paenibacillaceae      | <i>Cohnella</i>              | 51  | 24 | 5   | 2   | 0   | 0   | 0  | 0   | 0  | 28  | 110 |
| Deltaproteobacteria | Myxococcales       | Sandaracinaceae       | <i>Sandaracinus</i>          | 18  | 24 | 0   | 67  | 0   | 1   | 0  | 0   | 0  | 0   | 110 |
| Acidimicrobiia      | Acidimicrobiales   | Acidimicrobiaceae     | <i>CL500-29 Marine group</i> | 9   | 3  | 0   | 89  | 6   | 0   | 0  | 0   | 0  | 0   | 107 |
| Cytophagia          | Cytophagales       | Cytophagaceae         | <i>Spirosoma</i>             | 0   | 0  | 7   | 0   | 13  | 0   | 0  | 0   | 77 | 9   | 106 |
| Deltaproteobacteria | Oligoflexales      | Oligoflexaceae        | <i>Oligoflexus</i>           | 56  | 47 | 0   | 0   | 0   | 0   | 0  | 0   | 0  | 0   | 103 |
| Solibacteres        | Solibacterales     | Solibacteraceae       | <i>Bryobacter</i>            | 0   | 1  | 2   | 95  | 0   | 0   | 0  | 0   | 3  | 0   | 101 |
| Sphingobacteriia    | Sphingobacteriales | Chitinophagaceae      | <i>Dinghuibacter</i>         | 0   | 0  | 0   | 0   | 82  | 0   | 0  | 15  | 2  | 0   | 99  |

|                     |                    |                    |                           |    |    |    |    |    |   |    |    |    |    |    |
|---------------------|--------------------|--------------------|---------------------------|----|----|----|----|----|---|----|----|----|----|----|
| Clostridia          | Clostridiales      | Ruminococcaceae    | <i>Caproiciproducens</i>  | 4  | 2  | 0  | 0  | 0  | 0 | 25 | 0  | 5  | 60 | 96 |
| Betaproteobacteria  | Burkholderiales    | Burkholderiaceae   | <i>Pandoraea</i>          | 0  | 0  | 0  | 0  | 26 | 1 | 1  | 67 | 0  | 1  | 96 |
| Sphingobacteriia    | Sphingobacteriales | Chitinophagaceae   | <i>Filimonas</i>          | 2  | 0  | 6  | 1  | 0  | 0 | 0  | 0  | 78 | 7  | 94 |
| Betaproteobacteria  | Burkholderiales    | Alcaligenaceae     | <i>Achromobacter</i>      | 4  | 6  | 14 | 5  | 5  | 9 | 0  | 18 | 26 | 6  | 93 |
| Alphaproteobacteria | Rhodospirillales   | Rhodospirillaceae  | <i>Phaeospirillum</i>     | 0  | 0  | 0  | 0  | 0  | 0 | 0  | 0  | 85 | 0  | 85 |
| Actinobacteria      | Micrococcales      | Cellulomonadaceae  | <i>Actinotalea</i>        | 10 | 3  | 3  | 26 | 4  | 0 | 3  | 20 | 8  | 1  | 78 |
| Deltaproteobacteria | Bdellovibrionales  | Bacteriovoraceae   | <i>Peredibacter</i>       | 3  | 1  | 43 | 2  | 14 | 2 | 0  | 0  | 0  | 12 | 77 |
| Sphingobacteriia    | Sphingobacteriales | Chitinophagaceae   | <i>Terrimonas</i>         | 23 | 3  | 6  | 42 | 0  | 0 | 0  | 2  | 0  | 0  | 76 |
| Actinobacteria      | Frankiales         | Frankiaceae        | <i>Jatrophihabitans</i>   | 2  | 0  | 2  | 1  | 39 | 0 | 6  | 3  | 21 | 0  | 74 |
| Betaproteobacteria  | Burkholderiales    | Comamonadaceae     | <i>Sphaerotilus</i>       | 0  | 0  | 0  | 0  | 31 | 1 | 7  | 23 | 9  | 2  | 73 |
| Gammaproteobacteria | Chromatiales       | Chromatiaceae      | <i>Rheinheimera</i>       | 17 | 6  | 16 | 23 | 4  | 0 | 0  | 0  | 0  | 0  | 66 |
| Alphaproteobacteria | Rhodospirillales   | Acetobacteraceae   | <i>Rhodovastum</i>        | 0  | 0  | 6  | 0  | 23 | 0 | 2  | 13 | 21 | 0  | 65 |
| Alphaproteobacteria | Sphingomonadales   | Sphingomonadaceae  | <i>Zymomonas</i>          | 12 | 0  | 0  | 1  | 10 | 3 | 23 | 4  | 2  | 7  | 62 |
| Betaproteobacteria  | Burkholderiales    | Comamonadaceae     | <i>Ideonella</i>          | 2  | 2  | 0  | 58 | 0  | 0 | 0  | 0  | 0  | 0  | 62 |
| Gammaproteobacteria | Enterobacteriales  | Enterobacteriaceae | <i>Citrobacter</i>        | 0  | 1  | 0  | 0  | 0  | 0 | 0  | 1  | 0  | 59 | 61 |
| Actinobacteria      | Frankiales         | Nakamurellaceae    | <i>Nakamurella</i>        | 7  | 1  | 24 | 27 | 1  | 0 | 0  | 0  | 0  | 0  | 60 |
| Actinobacteria      | Micrococcales      | Microbacteriaceae  | <i>Frigoribacterium</i>   | 20 | 17 | 2  | 19 | 0  | 0 | 0  | 0  | 1  | 0  | 59 |
| Alphaproteobacteria | Rhizobiales        | Hyphomicrobiaceae  | <i>Blastochloris</i>      | 31 | 28 | 0  | 0  | 0  | 0 | 0  | 0  | 0  | 0  | 59 |
| Actinobacteria      | Micrococcales      | Microbacteriaceae  | <i>Microbacterium</i>     | 10 | 3  | 0  | 7  | 8  | 1 | 7  | 19 | 3  | 0  | 58 |
| Alphaproteobacteria | Rhizobiales        | Xanthobacteraceae  | <i>Xanthobacter</i>       | 1  | 1  | 55 | 1  | 0  | 0 | 0  | 0  | 0  | 0  | 58 |
| Betaproteobacteria  | Rhodocyclales      | Rhodocyclaceae     | <i>Uliginosibacterium</i> | 21 | 29 | 0  | 2  | 0  | 0 | 0  | 0  | 5  | 0  | 57 |
| Actinobacteria      | Micrococcales      | Cellulomonadaceae  | <i>Paraoerskovia</i>      | 2  | 5  | 0  | 47 | 0  | 0 | 0  | 0  | 0  | 0  | 54 |
| Alphaproteobacteria | Rhizobiales        | Beijerinckiaceae   | <i>Methylocella</i>       | 0  | 0  | 0  | 0  | 1  | 0 | 3  | 30 | 18 | 1  | 53 |
| Alphaproteobacteria | Rhizobiales        | Phyllobacteriaceae | <i>Phyllobacterium</i>    | 4  | 1  | 40 | 8  | 0  | 0 | 0  | 0  | 0  | 0  | 53 |
| Betaproteobacteria  | Burkholderiales    | Oxalobacteraceae   | <i>Noviherbaspirillum</i> | 5  | 9  | 5  | 0  | 1  | 0 | 2  | 30 | 1  | 0  | 53 |
| Betaproteobacteria  | Burkholderiales    | Comamonadaceae     | <i>Pseudorhodoferax</i>   | 7  | 4  | 23 | 5  | 0  | 1 | 0  | 0  | 0  | 12 | 52 |
| Bacilli             | Lactobacillales    | Carnobacteriaceae  | <i>Isobaculum</i>         | 0  | 0  | 0  | 0  | 0  | 0 | 0  | 0  | 52 | 0  | 52 |
| Betaproteobacteria  | Burkholderiales    | Comamonadaceae     | <i>Mitsuaria</i>          | 1  | 1  | 0  | 0  | 49 | 0 | 0  | 0  | 0  | 0  | 51 |
| Betaproteobacteria  | Burkholderiales    | Oxalobacteraceae   | <i>Oxalobacter</i>        | 0  | 0  | 0  | 0  | 0  | 0 | 0  | 51 | 0  | 0  | 51 |
| Clostridia          | Clostridiales      | Lachnospiraceae    | <i>Lachnoclostridium</i>  | 1  | 0  | 3  | 0  | 0  | 1 | 2  | 0  | 8  | 35 | 50 |
| Actinobacteria      | Micrococcales      | Microbacteriaceae  | <i>Klugiella</i>          | 3  | 4  | 1  | 34 | 1  | 0 | 1  | 2  | 3  | 1  | 50 |
| Betaproteobacteria  | Neisseriales       | Neisseriaceae      | <i>Pseudogulbenkiania</i> | 0  | 0  | 0  | 0  | 0  | 0 | 0  | 10 | 39 | 0  | 49 |
| Cytophagia          | Cytophagales       | Cytophagaceae      | <i>Leadbetterella</i>     | 19 | 5  | 24 | 0  | 0  | 0 | 0  | 0  | 0  | 0  | 48 |
| Betaproteobacteria  | Neisseriales       | Neisseriaceae      | <i>Vitreoscilla</i>       | 17 | 3  | 6  | 1  | 0  | 0 | 14 | 0  | 7  | 0  | 48 |
| Bacilli             | Lactobacillales    | Carnobacteriaceae  | <i>Carnobacterium</i>     | 19 | 22 | 1  | 0  | 0  | 4 | 0  | 0  | 1  | 0  | 47 |
| Gammaproteobacteria | Orbales            | Orbaceae           | <i>Gilliamella</i>        | 0  | 0  | 0  | 0  | 0  | 0 | 0  | 0  | 46 | 0  | 46 |

|                     |                     |                     |                             |    |    |    |    |    |    |   |    |    |    |    |
|---------------------|---------------------|---------------------|-----------------------------|----|----|----|----|----|----|---|----|----|----|----|
| Gammaproteobacteria | Xanthomonadales     | Xanthomonadaceae    | <i>Pseudoxanthomonas</i>    | 4  | 0  | 8  | 0  | 7  | 0  | 3 | 9  | 15 | 0  | 46 |
| Verrucomicrobiae    | Verrucomicrobiales  | Verrucomicrobiaceae | <i>Haloferula</i>           | 0  | 0  | 0  | 0  | 0  | 0  | 0 | 0  | 0  | 45 | 45 |
| Planctomycetacia    | Planctomycetales    | Planctomycetaceae   | <i>Isosphaera</i>           | 0  | 0  | 5  | 0  | 2  | 0  | 0 | 1  | 36 | 0  | 44 |
| Gammaproteobacteria | Xanthomonadales     | Xanthomonadales IS  | <i>Acidibacter</i>          | 0  | 0  | 0  | 0  | 43 | 0  | 0 | 0  | 1  | 0  | 44 |
| Acidobacteria       | Acidobacteriales    | Acidobacteriaceae   | <i>Acidobacterium</i>       | 0  | 0  | 0  | 0  | 43 | 0  | 0 | 0  | 0  | 0  | 43 |
| Alphaproteobacteria | Rhizobiales         | Xanthobacteraceae   | <i>Pseudolabrys</i>         | 5  | 1  | 1  | 0  | 0  | 0  | 0 | 0  | 19 | 16 | 42 |
| Gammaproteobacteria | Enterobacteriales   | Enterobacteriaceae  | <i>Yersinia</i>             | 0  | 0  | 0  | 0  | 16 | 11 | 9 | 6  | 0  | 0  | 42 |
| Alphaproteobacteria | Rhodospirillales    | Acetobacteraceae    | <i>Acidisphaera</i>         | 0  | 0  | 0  | 0  | 8  | 0  | 0 | 2  | 31 | 0  | 41 |
| Gammaproteobacteria | Enterobacteriales   | Enterobacteriaceae  | <i>Raoultella</i>           | 0  | 0  | 0  | 0  | 0  | 5  | 0 | 0  | 1  | 34 | 40 |
| Betaproteobacteria  | Neisseriales        | Neisseriaceae       | <i>Chitiniphilus</i>        | 0  | 0  | 0  | 0  | 0  | 6  | 0 | 9  | 5  | 19 | 39 |
| Actinobacteria      | Corynebacteriales   | Nocardiaceae        | <i>Nocardia</i>             | 14 | 14 | 10 | 0  | 0  | 0  | 0 | 0  | 0  | 0  | 38 |
| Alphaproteobacteria | Rhodospirillales    | Rhodospirillaceae   | <i>Telmatospirillum</i>     | 0  | 0  | 0  | 0  | 0  | 0  | 0 | 0  | 37 | 0  | 37 |
| Blastocatellia      | Blastocatellales    | Blastocatellaceae   | <i>Blastocatella</i>        | 30 | 4  | 0  | 0  | 0  | 0  | 0 | 0  | 2  | 0  | 36 |
| Alphaproteobacteria | Rhizobiales         | Rhizobiales         | <i>Phreatobacter</i>        | 0  | 0  | 2  | 0  | 2  | 0  | 0 | 0  | 2  | 29 | 35 |
| Alphaproteobacteria | Rhizobiales         | Roseiarcaceae       | <i>Roseiarcus</i>           | 0  | 0  | 0  | 0  | 11 | 0  | 0 | 11 | 10 | 2  | 34 |
| Betaproteobacteria  | Neisseriales        | Neisseriaceae       | <i>Microvirgula</i>         | 2  | 0  | 9  | 0  | 0  | 0  | 0 | 0  | 23 | 0  | 34 |
| Alphaproteobacteria | Rhizobiales         | Brucellaceae        | <i>Ochrobactrum</i>         | 0  | 0  | 2  | 0  | 0  | 3  | 0 | 0  | 2  | 25 | 32 |
| Betaproteobacteria  | Rhodocyclales       | Rhodocyclaceae      | <i>Georgfuchsia</i>         | 2  | 5  | 0  | 0  | 25 | 0  | 0 | 0  | 0  | 0  | 32 |
| Verrucomicrobiae    | Verrucomicrobiales  | Verrucomicrobiaceae | <i>Luteolibacter</i>        | 2  | 4  | 10 | 2  | 0  | 0  | 0 | 0  | 6  | 7  | 31 |
| Alphaproteobacteria | Rhizobiales         | Xanthobacteraceae   | <i>Variibacter</i>          | 8  | 2  | 8  | 8  | 5  | 0  | 0 | 0  | 0  | 0  | 31 |
| Gammaproteobacteria | Enterobacteriales   | Enterobacteriaceae  | <i>Pectobacterium</i>       | 0  | 0  | 0  | 0  | 0  | 2  | 0 | 23 | 0  | 4  | 29 |
| Sphingobacteriia    | Sphingobacteriales  | Sphingobacteriaceae | <i>Arcticibacter</i>        | 9  | 1  | 0  | 15 | 0  | 0  | 3 | 0  | 1  | 0  | 29 |
| Alphaproteobacteria | Sphingomonadales    | Sphingomonadaceae   | <i>Sandaracinobacter</i>    | 0  | 0  | 11 | 0  | 0  | 6  | 2 | 4  | 6  | 0  | 29 |
| Alphaproteobacteria | Rhizobiales         | Xanthobacteraceae   | <i>Labrys</i>               | 0  | 0  | 1  | 2  | 0  | 0  | 0 | 7  | 18 | 0  | 28 |
| Betaproteobacteria  | Burkholderiales     | Comamonadaceae      | <i>Brachymonas</i>          | 9  | 13 | 0  | 6  | 0  | 0  | 0 | 0  | 0  | 0  | 28 |
| Betaproteobacteria  | Burkholderiales     | Comamonadaceae      | <i>Paucibacter</i>          | 1  | 2  | 0  | 5  | 20 | 0  | 0 | 0  | 0  | 0  | 28 |
| Actinobacteria      | Propionibacteriales | Nocardioidaceae     | <i>Nocardioides</i>         | 0  | 4  | 0  | 0  | 16 | 0  | 0 | 0  | 7  | 0  | 27 |
| Clostridia          | Clostridiales       | Peptococcaceae      | <i>Desulfosporosinus</i>    | 8  | 3  | 16 | 0  | 0  | 0  | 0 | 0  | 0  | 0  | 27 |
| Clostridia          | Clostridiales       | Ruminococcaceae     | <i>Anaerotruncus</i>        | 0  | 0  | 0  | 0  | 27 | 0  | 0 | 0  | 0  | 0  | 27 |
| Gammaproteobacteria | Legionellales       | Coxiellaceae        | <i>Coxiella</i>             | 0  | 0  | 2  | 0  | 4  | 0  | 0 | 0  | 21 | 0  | 27 |
| Gammaproteobacteria | Enterobacteriales   | Enterobacteriaceae  | <i>Escherichia-Shigella</i> | 0  | 0  | 2  | 0  | 0  | 11 | 1 | 2  | 1  | 9  | 26 |
| Alphaproteobacteria | Rhizobiales         | Rhizobiaceae        | <i>Shinella</i>             | 7  | 2  | 4  | 8  | 3  | 0  | 0 | 1  | 0  | 1  | 26 |
| Acidobacteria       | Acidobacteriales    | Acidobacteriaceae   | <i>Acidicapsa</i>           | 0  | 0  | 0  | 0  | 25 | 0  | 0 | 0  | 0  | 0  | 25 |
| Sphingobacteriia    | Sphingobacteriales  | Chitinophagaceae    | <i>Flavitalea</i>           | 9  | 5  | 11 | 0  | 0  | 0  | 0 | 0  | 0  | 0  | 25 |
| Sphingobacteriia    | Sphingobacteriales  | Saprospiraceae      | <i>Portibacter</i>          | 9  | 16 | 0  | 0  | 0  | 0  | 0 | 0  | 0  | 0  | 25 |
| Alphaproteobacteria | Rhizobiales         | Beijerinckiaceae    | <i>Chelatococcus</i>        | 8  | 6  | 6  | 5  | 0  | 0  | 0 | 0  | 0  | 0  | 25 |

|                     |                   |                    |                                |    |    |    |    |    |   |    |    |    |    |    |
|---------------------|-------------------|--------------------|--------------------------------|----|----|----|----|----|---|----|----|----|----|----|
| Alphaproteobacteria | Rickettsiales     | Rickettsiaceae     | <i>Trichorickettsia</i>        | 0  | 0  | 2  | 0  | 4  | 0 | 0  | 0  | 19 | 0  | 25 |
| Gammaproteobacteria | Oceanospirillales | Oceanospirillaceae | <i>Pseudohongiella</i>         | 13 | 3  | 0  | 7  | 0  | 0 | 0  | 0  | 2  | 0  | 25 |
| Gammaproteobacteria | Thiotrichales     | Thiotrichaceae     | <i>Thiothrix</i>               | 17 | 6  | 0  | 0  | 2  | 0 | 0  | 0  | 0  | 0  | 25 |
| Spirochaetes        | Spirochaetales    | Spirochaetaceae    | <i>Spirochaeta</i>             | 0  | 0  | 2  | 0  | 0  | 0 | 0  | 0  | 0  | 22 | 24 |
| Betaproteobacteria  | Burkholderiales   | Comamonadaceae     | <i>Curvibacter</i>             | 0  | 1  | 6  | 0  | 0  | 0 | 0  | 1  | 8  | 8  | 24 |
| Phycisphaerae       | Phycisphaerales   | Phycisphaeraceae   | <i>SM1A02</i>                  | 11 | 12 | 0  | 1  | 0  | 0 | 0  | 0  | 0  | 0  | 24 |
| Alphaproteobacteria | Rickettsiales     | Rickettsiaceae     | <i>Rickettsia</i>              | 0  | 0  | 1  | 0  | 9  | 1 | 0  | 0  | 12 | 0  | 23 |
| Acidobacteria       | Acidobacteriales  | Acidobacteriaceae  | <i>Bryocella</i>               | 0  | 0  | 0  | 0  | 2  | 0 | 1  | 15 | 4  | 0  | 22 |
| Gammaproteobacteria | Enterobacteriales | Enterobacteriaceae | <i>Pseudocitrobacter</i>       | 0  | 0  | 0  | 0  | 0  | 0 | 0  | 0  | 0  | 21 | 21 |
| Alphaproteobacteria | Rhizobiales       | Hyphomicrobiaceae  | <i>Hyphomicrobium</i>          | 10 | 2  | 2  | 7  | 0  | 0 | 0  | 0  | 0  | 0  | 21 |
| Alphaproteobacteria | Rhodospirillales  | Acetobacteraceae   | <i>Acidiphilium</i>            | 0  | 0  | 0  | 0  | 10 | 0 | 9  | 1  | 1  | 0  | 21 |
| Betaproteobacteria  | Burkholderiales   | Comamonadaceae     | <i>Limnohabitas</i>            | 5  | 6  | 1  | 1  | 0  | 0 | 0  | 0  | 8  | 0  | 21 |
| Betaproteobacteria  | Rhodocyclales     | Rhodocyclaceae     | <i>Thauera</i>                 | 5  | 2  | 8  | 0  | 0  | 0 | 0  | 0  | 6  | 0  | 21 |
| Deltaproteobacteria | Myxococcales      | Haliangiaceae      | <i>Haliangium</i>              | 0  | 4  | 0  | 0  | 5  | 0 | 0  | 0  | 12 | 0  | 21 |
| Actinobacteria      | Micrococcales     | Micrococcaceae     | <i>Paeniglutamicibacter</i>    | 10 | 10 | 0  | 0  | 0  | 0 | 0  | 0  | 0  | 0  | 20 |
| Bacilli             | Bacillales        | Listeriaceae       | <i>Listeria</i>                | 17 | 1  | 0  | 1  | 0  | 0 | 0  | 0  | 0  | 0  | 19 |
| Betaproteobacteria  | Burkholderiales   | Alcaligenaceae     | <i>Verticia</i>                | 7  | 4  | 0  | 8  | 0  | 0 | 0  | 0  | 0  | 0  | 19 |
| Betaproteobacteria  | Burkholderiales   | Oxalobacteraceae   | <i>Aquaspirillum</i>           | 0  | 0  | 0  | 0  | 19 | 0 | 0  | 0  | 0  | 0  | 19 |
| Gammaproteobacteria | Enterobacteriales | Enterobacteriaceae | <i>Buttiauxella</i>            | 0  | 0  | 0  | 0  | 2  | 6 | 3  | 0  | 1  | 6  | 18 |
| Actinobacteria      | Micrococcales     | Microbacteriaceae  | <i>Amnibacterium</i>           | 0  | 0  | 0  | 0  | 17 | 0 | 0  | 0  | 1  | 0  | 18 |
| Actinobacteria      | Pseudonocardiales | Pseudonocardiaceae | <i>Actinomycetospora</i>       | 1  | 1  | 1  | 0  | 10 | 0 | 0  | 0  | 5  | 0  | 18 |
| Alphaproteobacteria | Rhizobiales       | Phyllobacteriaceae | <i>Aminobacter</i>             | 0  | 0  | 8  | 9  | 0  | 0 | 0  | 0  | 1  | 0  | 18 |
| Betaproteobacteria  | Burkholderiales   | Comamonadaceae     | <i>Ottowia</i>                 | 8  | 7  | 0  | 2  | 1  | 0 | 0  | 0  | 0  | 0  | 18 |
| Gammaproteobacteria | Xanthomonadales   | Xanthomonadaceae   | <i>Chiayiivirga</i>            | 0  | 1  | 0  | 17 | 0  | 0 | 0  | 0  | 0  | 0  | 18 |
| Betaproteobacteria  | Burkholderiales   | Oxalobacteraceae   | <i>Paucimonas</i>              | 0  | 0  | 5  | 0  | 0  | 0 | 12 | 0  | 0  | 0  | 17 |
| Planctomycetacia    | Planctomycetales  | Planctomycetaceae  | <i>Singulisphaera</i>          | 0  | 0  | 6  | 2  | 0  | 0 | 0  | 0  | 8  | 0  | 16 |
| Alphaproteobacteria | Rickettsiales     | Rickettsiales IS   | <i>Odyssella</i>               | 0  | 0  | 0  | 0  | 16 | 0 | 0  | 0  | 0  | 0  | 16 |
| Gammaproteobacteria | Xanthomonadales   | Xanthomonadaceae   | <i>Thermomonas</i>             | 8  | 8  | 0  | 0  | 0  | 0 | 0  | 0  | 0  | 0  | 16 |
| Chthonomonadetes    | Chthonomonadales  | Chthonomonadaceae  | <i>Chthonomonas</i>            | 0  | 0  | 0  | 0  | 15 | 0 | 0  | 0  | 0  | 0  | 15 |
| Alphaproteobacteria | Sphingomonadales  | Erythrobacteraceae | <i>Altererythrobacter</i>      | 5  | 2  | 1  | 5  | 0  | 0 | 0  | 2  | 0  | 0  | 15 |
| Alphaproteobacteria | Sphingomonadales  | Sphingomonadaceae  | <i>Sphingorhabdus</i>          | 0  | 0  | 0  | 0  | 0  | 0 | 0  | 4  | 11 | 0  | 15 |
| Betaproteobacteria  | Neisseriales      | Neisseriaceae      | <i>Amantichitinum</i>          | 0  | 0  | 0  | 0  | 0  | 3 | 0  | 3  | 5  | 3  | 14 |
| Alphaproteobacteria | Rhizobiales       | Xanthobacteraceae  | <i>Starkeya</i>                | 1  | 0  | 9  | 3  | 0  | 0 | 0  | 0  | 0  | 1  | 14 |
| Actinobacteria      | Streptomycetales  | Streptomycetaceae  | <i>E1B-B3-114</i>              | 0  | 5  | 5  | 1  | 0  | 3 | 0  | 0  | 0  | 0  | 14 |
| Clostridia          | Clostridiales     | Lachnospiraceae    | <i>Lachnospiraceae UCG-007</i> | 0  | 1  | 11 | 2  | 0  | 0 | 0  | 0  | 0  | 0  | 14 |
| Alphaproteobacteria | Rhodobacterales   | Rhodobacteraceae   | <i>Rhodobacter</i>             | 3  | 7  | 2  | 0  | 0  | 0 | 0  | 0  | 2  | 0  | 14 |

|                     |                      |                       |                           |   |   |   |    |    |   |   |   |   |   |    |
|---------------------|----------------------|-----------------------|---------------------------|---|---|---|----|----|---|---|---|---|---|----|
| Betaproteobacteria  | Burkholderiales      | Comamonadaceae        | <i>Leptothrix</i>         | 2 | 2 | 0 | 0  | 10 | 0 | 0 | 0 | 0 | 0 | 14 |
| Gammaproteobacteria | Legionellales        | Coxiellaceae          | <i>Aquicella</i>          | 0 | 0 | 0 | 0  | 12 | 0 | 0 | 0 | 2 | 0 | 14 |
| Gammaproteobacteria | Xanthomonadales      | Xanthomonadaceae      | <i>Ignatzschinaria</i>    | 3 | 0 | 4 | 0  | 0  | 2 | 0 | 0 | 2 | 2 | 13 |
| Deltaproteobacteria | Myxococcales         | Phaselicystidaceae    | <i>Phaselicystis</i>      | 5 | 0 | 0 | 0  | 0  | 0 | 2 | 0 | 6 | 0 | 13 |
| Gammaproteobacteria | Enterobacteriales    | Enterobacteriaceae    | <i>Erwinia</i>            | 0 | 1 | 5 | 0  | 0  | 1 | 0 | 0 | 2 | 3 | 12 |
| Cytophagia          | Cytophagales         | Cytophagaceae         | <i>Hymenobacter</i>       | 0 | 0 | 0 | 0  | 12 | 0 | 0 | 0 | 0 | 0 | 12 |
| Flavobacteriia      | Flavobacteriales     | Flavobacteriaceae     | <i>Cloacibacterium</i>    | 1 | 2 | 0 | 0  | 7  | 1 | 0 | 0 | 1 | 0 | 12 |
| Clostridia          | Clostridiales        | Ruminococcaceae       | <i>Ruminiclostridium</i>  | 0 | 0 | 9 | 0  | 0  | 0 | 0 | 3 | 0 | 0 | 12 |
| Alphaproteobacteria | Rhizobiales          | Hyphomicrobiaceae     | <i>Methylohabdus</i>      | 5 | 6 | 1 | 0  | 0  | 0 | 0 | 0 | 0 | 0 | 12 |
| Actinobacteria      | Micrococcales        | Microbacteriaceae     | <i>Curtobacterium</i>     | 0 | 0 | 2 | 0  | 4  | 0 | 0 | 2 | 3 | 0 | 11 |
| Betaproteobacteria  | Burkholderiales      | Alcaligenaceae        | <i>Castellaniella</i>     | 0 | 0 | 0 | 0  | 11 | 0 | 0 | 0 | 0 | 0 | 11 |
| Betaproteobacteria  | Burkholderiales      | Comamonadaceae        | <i>Azohydromonas</i>      | 0 | 0 | 0 | 11 | 0  | 0 | 0 | 0 | 0 | 0 | 11 |
| Actinobacteria      | Corynebacteriales    | Nocardiaceae          | <i>Williamsia</i>         | 2 | 0 | 0 | 8  | 0  | 0 | 0 | 0 | 0 | 0 | 10 |
| Betaproteobacteria  | Burkholderiales      | Burkholderiaceae      | <i>Polynucleobacter</i>   | 1 | 0 | 7 | 0  | 2  | 0 | 0 | 0 | 0 | 0 | 10 |
| Clostridia          | Clostridiales        | Peptostreptococcaceae | <i>Romboutsia</i>         | 2 | 5 | 0 | 0  | 1  | 0 | 0 | 0 | 0 | 1 | 9  |
| Actinobacteria      | Micrococcales        | Micrococcaceae        | <i>Arthrobacter</i>       | 9 | 0 | 0 | 0  | 0  | 0 | 0 | 0 | 0 | 0 | 9  |
| Sphingobacteriia    | Sphingobacteriales   | Chitinophagaceae      | <i>Flaviumibacter</i>     | 0 | 0 | 5 | 4  | 0  | 0 | 0 | 0 | 0 | 0 | 9  |
| Alphaproteobacteria | Rhodobacterales      | Rhodobacteraceae      | <i>Amaricoccus</i>        | 0 | 0 | 0 | 0  | 9  | 0 | 0 | 0 | 0 | 0 | 9  |
| Alphaproteobacteria | Rhodospirillales     | Acetobacteraceae      | <i>Craurococcus</i>       | 0 | 0 | 7 | 1  | 0  | 0 | 0 | 1 | 0 | 0 | 9  |
| Alphaproteobacteria | Rhodospirillales     | Rhodospirillaceae     | <i>Nitrospirillum</i>     | 0 | 0 | 0 | 0  | 0  | 0 | 0 | 0 | 9 | 0 | 9  |
| Betaproteobacteria  | Nitrosomonadales     | Gallionellaceae       | <i>Sideroxydans</i>       | 0 | 0 | 0 | 0  | 6  | 0 | 0 | 3 | 0 | 0 | 9  |
| Gammaproteobacteria | Enterobacteriales    | Enterobacteriaceae    | <i>Klebsiella</i>         | 0 | 0 | 3 | 0  | 0  | 3 | 0 | 0 | 1 | 1 | 8  |
| Actinobacteria      | Frankiales           | Sporichthyaceae       | <i>Sporichthya</i>        | 3 | 4 | 0 | 1  | 0  | 0 | 0 | 0 | 0 | 0 | 8  |
| Actinobacteria      | Propionibacteriales  | Propionibacteriaceae  | <i>uncultured</i>         | 7 | 0 | 0 | 1  | 0  | 0 | 0 | 0 | 0 | 0 | 8  |
| Betaproteobacteria  | Burkholderiales      | Comamonadaceae        | <i>Albidiferax</i>        | 0 | 0 | 0 | 0  | 3  | 0 | 4 | 0 | 1 | 0 | 8  |
| Gammaproteobacteria | Enterobacteriales    | Enterobacteriaceae    | <i>Blochmannia</i>        | 0 | 0 | 0 | 0  | 0  | 0 | 8 | 0 | 0 | 0 | 8  |
| Gammaproteobacteria | Enterobacteriales    | Enterobacteriaceae    | <i>Enterobacter</i>       | 0 | 0 | 0 | 0  | 0  | 6 | 0 | 0 | 2 | 0 | 8  |
| Gammaproteobacteria | Xanthomonadales      | Xanthomonadaceae      | <i>Luteibacter</i>        | 0 | 0 | 0 | 0  | 7  | 1 | 0 | 0 | 0 | 0 | 8  |
| Gammaproteobacteria | Enterobacteriales    | Enterobacteriaceae    | <i>Lelliottia</i>         | 0 | 0 | 0 | 0  | 0  | 0 | 0 | 0 | 0 | 7 | 7  |
| Flavobacteriia      | Flavobacteriales     | Flavobacteriaceae     | <i>Bergeyella</i>         | 0 | 0 | 0 | 0  | 0  | 0 | 3 | 0 | 1 | 3 | 7  |
| Acidobacteria       | Acidobacteriales     | Acidobacteriaceae     | <i>Edaphobacter</i>       | 0 | 0 | 0 | 0  | 7  | 0 | 0 | 0 | 0 | 0 | 7  |
| Actinobacteria      | Micrococcales        | Microbacteriaceae     | <i>Pseudoclavibacter</i>  | 2 | 1 | 1 | 2  | 0  | 0 | 0 | 1 | 0 | 0 | 7  |
| Alphaproteobacteria | Rhizobiales          | Xanthobacteraceae     | <i>Pseudoxanthobacter</i> | 2 | 0 | 5 | 0  | 0  | 0 | 0 | 0 | 0 | 0 | 7  |
| Betaproteobacteria  | Rhodocyclales        | Rhodocyclaceae        | <i>Azoarcus</i>           | 0 | 0 | 0 | 0  | 7  | 0 | 0 | 0 | 0 | 0 | 7  |
| Deltaproteobacteria | Myxococcales         | Polyangiaceae         | <i>Labilithrix</i>        | 0 | 0 | 0 | 7  | 0  | 0 | 0 | 0 | 0 | 0 | 7  |
| Gammaproteobacteria | Acidiferrobacterales | Acidiferrobacteraceae | <i>Sulfurifustis</i>      | 0 | 0 | 0 | 0  | 7  | 0 | 0 | 0 | 0 | 0 | 7  |



|                     |                    |                        |                           |   |   |   |   |   |   |   |   |   |   |   |
|---------------------|--------------------|------------------------|---------------------------|---|---|---|---|---|---|---|---|---|---|---|
| Gammaproteobacteria | Xanthomonadales    | Xanthomonadaceae       | <i>Lysobacter</i>         | 1 | 1 | 3 | 2 | 0 | 0 | 0 | 0 | 0 | 0 | 7 |
| Synergistia         | Synergistales      | Synergistaceae         | <i>Aminivibrio</i>        | 0 | 0 | 5 | 0 | 1 | 0 | 0 | 0 | 1 | 0 | 7 |
| Clostridia          | Clostridiales      | Ruminococcaceae        | <i>Ruminiclostridium</i>  | 0 | 0 | 5 | 0 | 0 | 0 | 0 | 0 | 0 | 1 | 6 |
| Actinobacteria      | Kineosporiales     | Kineosporiaceae        | <i>Quadrisphaera</i>      | 0 | 0 | 0 | 1 | 2 | 0 | 0 | 2 | 1 | 0 | 6 |
| Actinobacteria      | Micrococcales      | Microbacteriaceae      | <i>Conyzicola</i>         | 1 | 0 | 0 | 5 | 0 | 0 | 0 | 0 | 0 | 0 | 6 |
| Sphingobacteriia    | Sphingobacteriales | Chitinophagaceae       | <i>Niabella</i>           | 3 | 0 | 0 | 3 | 0 | 0 | 0 | 0 | 0 | 0 | 6 |
| Alphaproteobacteria | Rhizobiales        | Hyphomicrobiaceae      | <i>Rhodomicrobium</i>     | 0 | 0 | 3 | 1 | 2 | 0 | 0 | 0 | 0 | 0 | 6 |
| Alphaproteobacteria | Rickettsiales      | Rickettsiaceae         | <i>Arcanobacter</i>       | 0 | 0 | 0 | 0 | 6 | 0 | 0 | 0 | 0 | 0 | 6 |
| Betaproteobacteria  | Neisseriales       | Neisseriaceae          | <i>Leeia</i>              | 5 | 0 | 1 | 0 | 0 | 0 | 0 | 0 | 0 | 0 | 6 |
| Gammaproteobacteria | Xanthomonadales    | Nevskiaceae            | <i>Nevskia</i>            | 0 | 0 | 0 | 0 | 0 | 0 | 2 | 4 | 0 | 0 | 6 |
| Gammaproteobacteria | Xanthomonadales    | Xanthomonadaceae       | <i>Dyella</i>             | 0 | 0 | 0 | 0 | 0 | 0 | 0 | 3 | 3 | 0 | 6 |
| Gammaproteobacteria | Aeromonadales      | Aeromonadaceae         | <i>Aeromonas</i>          | 0 | 0 | 0 | 0 | 0 | 0 | 5 | 1 | 0 | 0 | 6 |
| Betaproteobacteria  | Burkholderiales    | Oxalobacteraceae       | <i>Oxalibacterium</i>     | 0 | 0 | 0 | 0 | 0 | 0 | 0 | 0 | 4 | 1 | 5 |
| Actinobacteria      | Frankiales         | Geodermatophilaceae    | <i>Geodermatophilus</i>   | 0 | 2 | 0 | 3 | 0 | 0 | 0 | 0 | 0 | 0 | 5 |
| Actinobacteria      | Micrococcales      | Intrasporangiaceae     | <i>Oryzihumus</i>         | 0 | 0 | 0 | 0 | 5 | 0 | 0 | 0 | 0 | 0 | 5 |
| Chloroflexia        | Chloroflexales     | Oscillochloridaceae    | <i>Oscillochloris</i>     | 0 | 0 | 0 | 0 | 5 | 0 | 0 | 0 | 0 | 0 | 5 |
| Clostridia          | Clostridiales      | Eubacteriaceae         | <i>Alkalibacter</i>       | 4 | 1 | 0 | 0 | 0 | 0 | 0 | 0 | 0 | 0 | 5 |
| Clostridia          | Clostridiales      | Lachnospiraceae        | <i>Epulopiscium</i>       | 0 | 0 | 0 | 5 | 0 | 0 | 0 | 0 | 0 | 0 | 5 |
| Clostridia          | Clostridiales      | Lachnospiraceae        | <i>Tyzzereella</i>        | 0 | 0 | 3 | 0 | 0 | 0 | 0 | 1 | 1 | 0 | 5 |
| Alphaproteobacteria | Rhizobiales        | Rhizobiales IS         | <i>Agaricicola</i>        | 0 | 0 | 0 | 5 | 0 | 0 | 0 | 0 | 0 | 0 | 5 |
| Alphaproteobacteria | Rhodobacterales    | Rhodobacteraceae       | <i>Falsirhodobacter</i>   | 0 | 0 | 0 | 5 | 0 | 0 | 0 | 0 | 0 | 0 | 5 |
| Alphaproteobacteria | Rhodospirillales   | Rhodospirillales       | <i>Alysiosphaera</i>      | 2 | 0 | 3 | 0 | 0 | 0 | 0 | 0 | 0 | 0 | 5 |
| Betaproteobacteria  | Burkholderiales    | Comamonadaceae         | <i>Alicyclophilus</i>     | 0 | 3 | 1 | 1 | 0 | 0 | 0 | 0 | 0 | 0 | 5 |
| Betaproteobacteria  | Burkholderiales    | Comamonadaceae         | <i>Symbiobacter</i>       | 0 | 0 | 0 | 1 | 0 | 0 | 0 | 1 | 3 | 0 | 5 |
| Betaproteobacteria  | Burkholderiales    | Comamonadaceae         | <i>Rhodoferax</i>         | 1 | 0 | 0 | 1 | 1 | 0 | 0 | 0 | 2 | 0 | 5 |
| Betaproteobacteria  | Neisseriales       | Neisseriaceae          | <i>Vogesella</i>          | 0 | 0 | 0 | 0 | 0 | 0 | 0 | 0 | 5 | 0 | 5 |
| Gammaproteobacteria | Xanthomonadales    | Xanthomonadaceae       | <i>Dokdonella</i>         | 0 | 0 | 0 | 0 | 0 | 0 | 0 | 3 | 2 | 0 | 5 |
| Spartobacteria      | Chthoniobacterales | Xiphinematobacteraceae | <i>Xiphinematobacter</i>  | 3 | 0 | 2 | 0 | 0 | 0 | 0 | 0 | 0 | 0 | 5 |
| Alphaproteobacteria | Sphingomonadales   | Sphingomonadaceae      | <i>Rhizorhapis</i>        | 0 | 0 | 1 | 0 | 0 | 0 | 0 | 0 | 0 | 3 | 4 |
| Actinobacteria      | Micrococcales      | Promicromonosporaceae  | <i>Cellulosimicrobium</i> | 0 | 1 | 0 | 2 | 1 | 0 | 0 | 0 | 0 | 0 | 4 |
| Actinobacteria      | Streptomycetales   | Streptomycetaceae      | <i>Streptomyces</i>       | 0 | 0 | 0 | 4 | 0 | 0 | 0 | 0 | 0 | 0 | 4 |
| Cytophagia          | Cytophagales       | Cytophagaceae          | <i>Larkinella</i>         | 1 | 1 | 0 | 2 | 0 | 0 | 0 | 0 | 0 | 0 | 4 |
| Sphingobacteriia    | Sphingobacteriales | Sphingobacteriaceae    | <i>Pedobacterms03_R</i>   | 0 | 0 | 0 | 0 | 0 | 0 | 4 | 0 | 0 | 0 | 4 |
| Chlamydiae          | Chlamydiales       | Parachlamydiaceae      | <i>Neochlamydia</i>       | 0 | 0 | 0 | 0 | 4 | 0 | 0 | 0 | 0 | 0 | 4 |
| Cyanobacteria       | SubsectionI        | FamilyI                | <i>Prochlorococcus</i>    | 0 | 0 | 0 | 0 | 0 | 0 | 1 | 1 | 2 | 0 | 4 |
| Planctomycetacia    | Planctomycetales   | Planctomycetaceae      | <i>Pirellula</i>          | 0 | 2 | 0 | 2 | 0 | 0 | 0 | 0 | 0 | 0 | 4 |

|                     |                     |                       |                           |   |   |   |   |   |   |   |   |   |   |   |
|---------------------|---------------------|-----------------------|---------------------------|---|---|---|---|---|---|---|---|---|---|---|
| Alphaproteobacteria | Rhizobiales         | Methylocystaceae      | <i>Methylosinus</i>       | 0 | 2 | 0 | 2 | 0 | 0 | 0 | 0 | 0 | 0 | 4 |
| Alphaproteobacteria | Rhizobiales         | Rhizobiaceae          | <i>Ensifer</i>            | 0 | 0 | 2 | 2 | 0 | 0 | 0 | 0 | 0 | 0 | 4 |
| Alphaproteobacteria | Rickettsiales       | Rickettsiales IS      | <i>Finniella</i>          | 0 | 0 | 0 | 0 | 0 | 0 | 2 | 2 | 0 | 0 | 4 |
| Betaproteobacteria  | Methylophilales     | Methylophilaceae      | <i>Methylophilus</i>      | 0 | 0 | 2 | 0 | 0 | 0 | 0 | 2 | 0 | 0 | 4 |
| Actinobacteria      | Catenulisporales    | Actinospicaceae       | <i>Actinospica</i>        | 0 | 0 | 0 | 0 | 3 | 0 | 0 | 0 | 0 | 0 | 3 |
| Cytophagia          | Cytophagales        | Cytophagaceae         | <i>Sporocytophaga</i>     | 0 | 0 | 3 | 0 | 0 | 0 | 0 | 0 | 0 | 0 | 3 |
| Chlamydiae          | Chlamydiales        | Simkaniaceae          | <i>Renichlamydia</i>      | 0 | 0 | 0 | 0 | 0 | 0 | 2 | 1 | 0 | 0 | 3 |
| Clostridia          | Clostridiales       | Peptostreptococcaceae | <i>Peptoclostridium</i>   | 1 | 2 | 0 | 0 | 0 | 0 | 0 | 0 | 0 | 0 | 3 |
| Alphaproteobacteria | Caulobacterales     | Hyphomonadaceae       | <i>Woodsholea</i>         | 0 | 0 | 0 | 3 | 0 | 0 | 0 | 0 | 0 | 0 | 3 |
| Alphaproteobacteria | Rhizobiales         | C2U                   | <i>Pseudoxanthobacter</i> | 1 | 2 | 0 | 0 | 0 | 0 | 0 | 0 | 0 | 0 | 3 |
| Alphaproteobacteria | Rhizobiales         | Methylocystaceae      | <i>Methylocystis</i>      | 0 | 0 | 3 | 0 | 0 | 0 | 0 | 0 | 0 | 0 | 3 |
| Alphaproteobacteria | Rhodospirillales    | Acetobacteraceae      | <i>Humitalea</i>          | 0 | 0 | 0 | 3 | 0 | 0 | 0 | 0 | 0 | 0 | 3 |
| Alphaproteobacteria | Rickettsiales       | Anaplasmataceae       | <i>Wolbachia</i>          | 0 | 0 | 0 | 0 | 0 | 3 | 0 | 0 | 0 | 0 | 3 |
| Betaproteobacteria  | Burkholderiales     | Oxalobacteraceae      | <i>Glaciimonas</i>        | 0 | 0 | 0 | 0 | 3 | 0 | 0 | 0 | 0 | 0 | 3 |
| Deltaproteobacteria | Myxococcales        | Polyangiaceae         | <i>Aetherobacter</i>      | 0 | 0 | 0 | 0 | 3 | 0 | 0 | 0 | 0 | 0 | 3 |
| Gammaproteobacteria | Thiotrichales       | Thiotrichaceae        | <i>Beggiatoa</i>          | 0 | 0 | 0 | 0 | 3 | 0 | 0 | 0 | 0 | 0 | 3 |
| Alphaproteobacteria | Rhodobacterales     | Rhodobacteraceae      | <i>Roseivivax</i>         | 0 | 0 | 0 | 0 | 0 | 0 | 0 | 0 | 0 | 2 | 2 |
| Betaproteobacteria  | Burkholderiales     | Comamonadaceae        | <i>Giesbergeria</i>       | 0 | 0 | 0 | 0 | 0 | 0 | 0 | 0 | 0 | 2 | 2 |
| Gammaproteobacteria | Enterobacteriales   | Enterobacteriaceae    | <i>Cronobacter</i>        | 0 | 0 | 0 | 0 | 0 | 0 | 0 | 0 | 0 | 2 | 2 |
| Gammaproteobacteria | Enterobacteriales   | Enterobacteriaceae    | <i>Rosenbergiella</i>     | 0 | 0 | 0 | 0 | 0 | 0 | 0 | 0 | 0 | 2 | 2 |
| Gammaproteobacteria | Enterobacteriales   | Enterobacteriaceae    | <i>Salmonella</i>         | 0 | 0 | 0 | 0 | 0 | 0 | 0 | 0 | 0 | 2 | 2 |
| Alphaproteobacteria | Rhizobiales         | Bradyrhizobiaceae     | <i>Tardiphaga</i>         | 0 | 0 | 0 | 1 | 0 | 0 | 0 | 0 | 0 | 1 | 2 |
| Acidimicrobiia      | Acidimicrobiales    | Acidimicrobiaceae     | <i>Ilumatobacter</i>      | 0 | 1 | 0 | 1 | 0 | 0 | 0 | 0 | 0 | 0 | 2 |
| Actinobacteria      | Micrococcales       | Microbacteriaceae     | <i>Lysinimonas</i>        | 1 | 0 | 0 | 1 | 0 | 0 | 0 | 0 | 0 | 0 | 2 |
| Actinobacteria      | Micromonosporales   | Micromonosporaceae    | <i>Micromonospora</i>     | 0 | 0 | 0 | 0 | 2 | 0 | 0 | 0 | 0 | 0 | 2 |
| Thermoleophilia     | Solirubrobacterales | Solirubrobacteraceae  | <i>Solirubrobacter</i>    | 0 | 0 | 0 | 2 | 0 | 0 | 0 | 0 | 0 | 0 | 2 |
| Sphingobacteriia    | Sphingobacteriales  | Sphingobacteriaceae   | <i>Nubsella</i>           | 0 | 0 | 0 | 0 | 0 | 2 | 0 | 0 | 0 | 0 | 2 |
| Planctomycetacia    | Planctomycetales    | Planctomycetaceae     | <i>Schlesneria</i>        | 0 | 0 | 0 | 0 | 2 | 0 | 0 | 0 | 0 | 0 | 2 |
| Alphaproteobacteria | Rhizobiales         | Phyllobacteriaceae    | <i>Nitratireductor</i>    | 0 | 0 | 2 | 0 | 0 | 0 | 0 | 0 | 0 | 0 | 2 |
| Alphaproteobacteria | Rhodospirillales    | Acetobacteraceae      | <i>Acidocella</i>         | 0 | 0 | 0 | 0 | 0 | 0 | 0 | 2 | 0 | 0 | 2 |
| Alphaproteobacteria | Rhodospirillales    | Acetobacteraceae      | <i>Endobacter</i>         | 0 | 0 | 0 | 0 | 2 | 0 | 0 | 0 | 0 | 0 | 2 |
| Alphaproteobacteria | Sphingomonadales    | Sphingomonadaceae     | <i>Sphingomonas WWII</i>  | 1 | 0 | 0 | 1 | 0 | 0 | 0 | 0 | 0 | 0 | 2 |
| Betaproteobacteria  | Burkholderiales     | Burkholderiaceae      | <i>Cupriavidus</i>        | 0 | 0 | 2 | 0 | 0 | 0 | 0 | 0 | 0 | 0 | 2 |
| Betaproteobacteria  | Hydrogenophilales   | Hydrogenophilaceae    | <i>Thiobacillus</i>       | 0 | 0 | 0 | 0 | 0 | 0 | 0 | 0 | 2 | 0 | 2 |
| Betaproteobacteria  | Rhodocyclales       | Rhodocyclaceae        | <i>Azovibrio</i>          | 0 | 1 | 1 | 0 | 0 | 0 | 0 | 0 | 0 | 0 | 2 |
| Deltaproteobacteria | Myxococcales        | Polyangiaceae         | <i>Polyangium</i>         | 0 | 0 | 0 | 0 | 2 | 0 | 0 | 0 | 0 | 0 | 2 |
