# Supplementary material for: Diverse microbial communities hosted by the model carnivorous pitcher plant Sarracenia purpurea : analysis of both bacterial and eukaryotic composition across distinct host plant populations
Source: PeerJ journal article supplement (doi:10.7717/peerj.6392), 2019-02-18
Supplement: 18SGenus_species_TableS2_Oct17.pdf [file 18SGenus_species_TableS2_Oct17.pdf]

**Table S2.** Details of Eukaryotic taxa including Genus-species details (where available), identified in samples from 18S rRNA sequence analysis. Taxa are grouped by higher taxonomic affinity, which was determined using databases Algaebase.org, WORMS (www.marinespecies.org/), encyclopedia of life (eol.org). Totals for major groups are listed and Cedarburg and Sapa totals are show in shaded columns. Abbreviations: unc – uncultured, unclass – unclassified, IS – incertae sedis. Blank cells mean no counts were identified.

| Class                          | Family                 | Genus species                               | Median adjusted sequence number per sample |             |              |              |              |                  |              |              |              |              |              | Taxon totals  | top 25 taxon rank |             |    |
|--------------------------------|------------------------|---------------------------------------------|--------------------------------------------|-------------|--------------|--------------|--------------|------------------|--------------|--------------|--------------|--------------|--------------|---------------|-------------------|-------------|----|
|                                |                        |                                             | CB1p1                                      | CB1p2       | CB1p3        | CB1p4        | CB5p234      | Cedarburg Totals | Sp3p2        | Sp3p4        | Sp3p5        | Sp5p23       | Sp9p234      |               |                   | Sapa Totals |    |
| <b>Ciliates (Alveolata)</b>    |                        |                                             |                                            |             |              |              |              |                  |              |              |              |              |              |               |                   |             |    |
| Colpodea                       | Colpodidae             | <i>Colpoda_unc</i>                          |                                            |             |              |              |              |                  | 0            | 167          |              |              |              |               | 167               | 167         |    |
|                                | Cyrtolophosidida_IS    | <i>Cyrtolophosidida_unc</i>                 |                                            |             |              | 39           |              | 39               | 167          |              |              |              | 50           | 218           | 257               |             |    |
|                                | Cyrtolophosididae      | <i>Cyrtolophosidida_unc</i>                 |                                            |             |              |              |              | 0                |              |              |              | 39           | 39           | 39            |                   |             |    |
|                                | Cyrtolophosididae      | <i>Cyrtolophosis mucicola</i>               |                                            |             |              |              |              | 0                |              |              | 298          |              | 298          | 298           |                   |             |    |
|                                | Exocolpodidae          | <i>Exocolpoda augustini</i>                 |                                            | 10          | 60           |              | 329          | 399              |              |              |              |              |              | 0             | 399               |             |    |
|                                | Grossglockneriidae     | <i>Mykophagophrys terricola</i>             | 603                                        | 19          | 1219         | 63           | 958          | 2862             |              |              |              |              | 36           | 36            | 2898              | 19          |    |
|                                | Grossglockneriidae     | <i>Pseudoplatyophyra_unc</i>                |                                            |             | 37           | 145          |              | 182              | 258          |              | 16           | 506          | 31           | 810           | 992               |             |    |
|                                | Hausmanniellidae       | <i>Hausmanniella discoidea</i>              |                                            | 72          | 0            | 73           | 283          | 428              |              | 46           |              |              |              | 46            | 474               |             |    |
|                                | Woodruffiidae          | <i>Rostrophrya sp. MSD-2007</i>             |                                            |             |              |              |              | 0                |              |              | 48           |              |              | 48            | 48                |             |    |
|                                | Nassophorea            | Microthoracida                              | <i>Microthoracida_unc</i>                  |             |              |              |              |                  | 0            |              | 111          | 28           |              |               | 139               | 139         |    |
| Colpodidae                     |                        | <i>Colpoda steinii</i>                      | 12                                         |             | 476          | 70           |              | 558              |              |              |              |              | 18           | 18            | 577               |             |    |
| Oligohymenophorea              | Colpodidae             | <i>Colpodida_unc</i>                        |                                            |             |              |              |              | 0                | 12021        |              |              |              | 838          | 12859         | 12859             | 12          |    |
|                                | Leptopharyniidae       | <i>Leptopharynx costatus</i>                | 18                                         | 14          |              | 106          |              | 138              | 2042         |              | 157          | 208          | 146          | 2553          | 2690              | 20          |    |
|                                | Epistylidae            | <i>Campanella umbellaria</i>                |                                            |             |              |              | 2250         | 2250             |              |              |              |              |              | 0             | 2250              | 23          |    |
|                                | Frontoniidae           | <i>Apofrontonia dohrni</i>                  |                                            |             |              |              |              | 0                |              | 533          | 250          | 10           |              | 793           | 793               |             |    |
|                                | Orchitophryidae        | <i>Orchitophryidae_env_samp</i>             | 1003                                       | 959         | 21911        | 91016        | 4723         | 119613           | 5479         | 42           | 344          | 1738         | 46441        | 54044         | 173657            | 2           |    |
|                                | Loxocephalidae         | <i>Cardiostomatella_unc</i>                 |                                            |             |              |              |              | 0                |              |              |              |              | 37           | 37            | 37                |             |    |
|                                | Scuticociliatia_IS     | <i>Scuticociliatia_unc</i>                  | 22                                         | 15          |              | 161          | 52537        | 52735            |              | 66678        | 62242        | 1543         | 9            | 130472        | 183207            | 1           |    |
|                                | Tetrahymenidae         | <i>Tetrahymena sp. NI</i>                   |                                            |             |              |              |              | 0                | 19084        | 96           | 17           |              | 12           | 19209         | 19209             | 10          |    |
|                                | Uronematidae           | <i>Homalogastra setosa</i>                  |                                            |             |              |              |              | 0                |              |              |              | 8            |              | 8             | 8                 |             |    |
|                                | Ancistridae            | <i>Ancistrum_unc</i>                        |                                            |             |              |              |              | 0                |              |              | 14           |              |              | 14            | 14                |             |    |
| Prostomatea                    | Cryptocaryonidae       | <i>Cryptocaryon_unc</i>                     |                                            | 8           | 15           |              | 50           | 74               | 6224         | 15169        | 24046        | 47350        |              | 92789         | 92863             | 5           |    |
|                                | Prorodontidae          | <i>Prorodon_unc</i>                         |                                            |             |              |              |              | 0                |              |              |              | 34           |              | 34            | 34                |             |    |
| <b>Total Ciliates</b>          |                        |                                             | <b>1658</b>                                | <b>1097</b> | <b>23718</b> | <b>91675</b> | <b>61129</b> | <b>179277</b>    | <b>45442</b> | <b>82675</b> | <b>87460</b> | <b>51473</b> | <b>47581</b> | <b>314631</b> | <b>493908</b>     |             |    |
| <b>Parasitic Apicomplexans</b> |                        |                                             |                                            |             |              |              |              |                  |              |              |              |              |              |               |                   |             |    |
| Conoidasida                    | Actinocephalidae       | <i>Paraschneideria metamorphosa</i>         |                                            |             |              |              |              |                  | 0            | 329          |              |              |              | 329           | 329               |             |    |
|                                | Eimeriidae             | <i>Eimeriidae (Elev-185-1089)_unc</i>       |                                            |             |              |              |              |                  | 0            |              |              | 19           |              | 19            | 19                |             |    |
|                                | Eimeriidae             | <i>Eimeriidae_unc</i>                       |                                            |             |              |              |              |                  | 0            |              |              | 27           |              | 27            | 27                |             |    |
| <b>Athropoda</b>               |                        |                                             |                                            |             |              |              |              |                  |              |              |              |              |              |               |                   |             |    |
| Arachnida - mites              | Bdellidae              | <i>Bdellodes sp. AP-2010</i>                |                                            |             | 18           |              |              |                  | 18           |              |              |              |              | 0             | 18                |             |    |
|                                | Cymbaeremaeidae        | <i>Cymbaeremaeus cymba</i>                  |                                            |             |              |              |              |                  | 0            |              | 196          |              |              | 196           | 196               |             |    |
|                                | Eniochthoniidae        | <i>Eniochthonius sp. AD1066</i>             |                                            |             |              |              |              |                  | 0            |              |              | 263          |              | 263           | 263               |             |    |
|                                | Epilohmanniidae        | <i>Epilohmannia sp. 1 KD-2008</i>           |                                            |             |              |              |              |                  | 0            |              | 14           |              |              | 14            | 14                |             |    |
|                                | Eupodidae              | <i>Eupodidae sp. AMUENV025</i>              |                                            |             |              |              |              |                  | 0            |              | 112          | 17           |              | 13            | 142               | 142         |    |
|                                | Haplozetidae           | <i>Rostrozetes sp. 1 IS-2008</i>            |                                            |             |              | 227          |              | 227              |              |              |              |              |              | 43            | 43                | 270         |    |
|                                | Histiostomatidae       | <i>Ovanoetus sp. AD678</i>                  | 20                                         |             | 22           |              |              | 42               | 463          |              |              | 16           | 50           | 529           | 570               |             |    |
|                                | Liacaridae             | <i>Adaristes ovatus</i>                     |                                            |             |              |              |              | 0                | 55           |              |              |              |              | 55            | 55                |             |    |
|                                | Sarcoptiformes_Unclass | <i>Sarcoptiformes sp. JA-2011</i>           |                                            |             |              |              |              |                  | 0            |              |              |              | 240          | 240           | 240               |             |    |
|                                | Phenopelopidae         | <i>Eupelops hirtus</i>                      | 16                                         |             | 35           |              |              | 51               | 471          | 32           |              |              |              | 1746          | 2250              | 2301        | 22 |
|                                | Trhypochthoniidae      | <i>Afronothrus sp. AP-2010</i>              |                                            |             |              |              |              |                  | 0            |              |              |              | 215          | 215           | 215               |             |    |
|                                | Trhypochthoniidae      | <i>Trhypochthonius silvestris europaeus</i> |                                            |             |              | 2116         |              | 2116             |              |              | 2448         |              |              | 2448          | 4564              | 15          |    |
|                                | Trombidiidae           | <i>Trombidiinae sp. AMUENV055</i>           |                                            |             |              |              |              |                  | 0            |              |              |              | 10           | 10            | 10                |             |    |
| Arachnida - spiders            | Theridiidae            | <i>Enoplognatha margarita</i>               |                                            |             |              |              |              |                  | 0            |              | 566          |              |              | 566           | 566               |             |    |
|                                | Eresidae               | <i>Stegodyphus mimosarum</i>                |                                            |             |              |              | 1022         | 1022             |              |              |              |              |              | 0             | 1022              | 25          |    |
|                                | Linyphiidae            | <i>Gnathonarium dentatum</i>                |                                            |             | 12           |              |              | 12               |              |              |              |              |              | 0             | 12                |             |    |
|                                | Sabaconidae            | <i>Sabacon cavicolens</i>                   |                                            | 8           | 13           |              |              | 21               |              |              |              |              |              | 0             | 21                |             |    |
|                                | Mecysmaucheniiidae     | <i>Mecysmauchenius segmentatus</i>          |                                            |             |              |              |              | 0                |              |              | 16           |              |              | 16            | 16                |             |    |

|                            |                       |                                             |              |              |            |             |              |               |             |             |             |            |              |              |               |
|----------------------------|-----------------------|---------------------------------------------|--------------|--------------|------------|-------------|--------------|---------------|-------------|-------------|-------------|------------|--------------|--------------|---------------|
| Diplopoda                  | Spirostreptidae       | <i>Doratogonus sp. GG-2003</i>              | 11           | 17           |            |             | 28           |               |             |             |             | 0          | 28           |              |               |
|                            | Xystodesmidae         | <i>Cherokia georgiana</i>                   | 73302        | 75294        | 24         | 25          | 148645       |               | 11          |             |             | 11         | 148656       | 3            |               |
| Entognatha Collembola      | Hypogastruridae       | <i>Hypogastrura sp. CB02</i>                | 14           |              |            |             | 14           |               | 43          |             |             | 45         | 88           | 102          |               |
|                            | Katiannidae           | <i>Sminthurinus bimaculatus</i>             |              |              |            |             | 0            |               |             |             |             | 27         | 27           | 27           |               |
|                            | Neanuridae            | <i>Morulina verrucosa</i>                   |              |              |            |             | 0            |               | 30          |             |             |            | 30           | 30           |               |
|                            | Sminthuridae          | <i>Sminthuridae env sample</i>              |              | 20           | 37         |             | 57           |               | 16          | 251         | 33          | 52006      | 52306        | 52363        |               |
|                            | Sminthuridae          | <i>Sminthurides aquaticus</i>               |              |              |            |             | 0            |               |             |             |             | 288        | 288          | 288          |               |
|                            | Entomobryidae         | <i>Orchesellides sp. 9688-2 FZ-2013</i>     |              |              | 23         |             | 23           | 151           | 101         | 56          |             |            | 307          | 330          |               |
| Insecta                    | Cecidomyiidae         | <i>Camptomyia corticalis</i>                |              |              |            |             | 0            | 1165          |             |             |             |            | 1165         | 1165         | 24            |
|                            | Chironomidae          | <i>Acricotopus lucens</i>                   |              |              |            |             | 0            | 88            |             |             |             |            | 88           | 88           |               |
|                            | Culicidae             | <i>Aedes aegypti</i>                        |              |              |            |             | 9857         | 9857          |             |             |             |            | 0            | 9857         | 13            |
|                            | Culicidae             | <i>Uranotaenia lowii</i>                    |              |              |            |             | 7            | 7             |             | 3           | 25          | 42         | 70           | 77           |               |
|                            | Culicidae             | <i>Coquillettia perturbans</i>              |              |              |            |             | 124          |               | 335         | 2           |             |            | 337          | 337          |               |
|                            | Culicidae             | <i>Ochlerotatus atropalpu</i>               |              |              |            |             | 8            |               | 141         |             |             |            | 141          | 141          |               |
|                            | Formicidae            | <i>Notostigma carazzii</i>                  | 22           |              |            | 118         |              | 260           | 6517        | 40          | 3           | 3          | 6823         | 6823         | 14            |
|                            | Formicidae            | <i>Linepithema humile</i>                   | 11           | 23           | 27         | 97          |              | 14            | 16          |             |             |            | 30           | 30           |               |
|                            | Mycetaeidae           | <i>Mycetaea subterranea</i>                 |              |              |            |             | 0            |               |             | 75          |             |            | 75           | 75           |               |
| <b>Total Arthropods</b>    |                       |                                             | <b>73396</b> | <b>75362</b> | <b>438</b> | <b>2356</b> | <b>11018</b> | <b>162570</b> | <b>3143</b> | <b>6897</b> | <b>3663</b> | <b>795</b> | <b>54273</b> | <b>68771</b> | <b>231341</b> |
| <b>Mollusca Gastropoda</b> | Cochlicopidae         | <i>Cochlicopa lubrica</i>                   |              |              |            |             |              | 0             |             | 18315       | 14          |            | 18329        | 18329        | 11            |
|                            | Hermaeidae            | <i>Aplysiopsis minor</i>                    |              |              |            |             |              | 0             |             | 52          |             |            | 52           | 52           |               |
|                            | Otinidae              | <i>Otina ovata</i>                          |              |              |            |             |              | 0             |             | 28          |             |            | 28           | 28           |               |
| <b>Rotifer Bdelloidea</b>  | Adinetidae            | <i>Adineta vaga</i>                         | 54           | 56           |            | 36          |              | 146           |             |             |             | 12         | 12           | 158          |               |
| <b>Eutardigrada</b>        | Macrobotidae          | <i>Paramacrobotus richtersi sp. NG-2008</i> |              |              |            |             |              | 0             |             |             |             | 11         | 11           | 11           |               |
| <b>Fungi</b>               |                       |                                             |              |              |            |             |              |               |             |             |             |            |              |              |               |
| <b>Ascomycota</b>          |                       |                                             |              |              |            |             |              |               |             |             |             |            |              |              |               |
| Ascomycota_IS              | Ascomycota_IS         | <i>Slimacomyces isiola</i>                  |              |              |            |             |              | 0             | 55          |             |             |            | 55           | 55           |               |
| Dothideomycetes            | Pleosporales Fam_IS   | <i>Anguillospora furtiva</i>                |              |              | 11         |             |              | 11            |             |             |             |            | 0            | 11           |               |
|                            | Teratosphaeriaceae    | <i>Capnobotryella sp. MA 3612</i>           |              |              |            |             |              | 0             | 60          |             |             |            | 60           | 60           |               |
| Eurotiomycetes             | Herpotrichiellaceae   | <i>Herpotrichiellaceae sp. F-6</i>          |              |              |            |             |              | 0             | 121         |             |             |            | 121          | 121          |               |
| Lecanoromycetes            | Ochrolechiaceae       | <i>Ochrolechia szatalaensis</i>             |              |              |            |             |              | 0             | 123         |             |             |            | 123          | 123          |               |
| Leotiomycetes              | Cudoniaceae           | <i>Spathularia velutipes</i>                |              |              |            |             |              | 0             | 71          |             |             |            | 71           | 71           |               |
|                            | Hemiphaciaceae        | <i>Sarcotrochila macrospora</i>             |              |              |            |             |              | 0             | 3895        |             |             |            | 3895         | 3895         | 17            |
| Saccharomycetes            | Saccharomycetaceae    | <i>Candida palmioleophila</i>               | 54           | 49           | 622        | 37          |              | 762           | 3040        | 31          | 47          | 131        | 3248         | 4010         | 16            |
|                            | Saccharomycetaceae    | <i>Saccharomyces cerevisiae</i>             |              |              |            |             | 315          | 315           |             |             | 13          |            | 13           | 328          |               |
|                            | Saccharomycetales_unc | <i>Saccharomycetales_unc</i>                |              |              |            |             |              | 0             | 82          |             |             |            | 82           | 82           |               |
| Sordariomycetes            | Ophiocordycipitaceae  | <i>Ophiocordyceps robertsii</i>             |              |              | 15         |             |              | 15            | 55          |             |             |            | 55           | 70           |               |
|                            | Sordariomycetes_IS    | <i>Verticillium alfalfae VaMs.102</i>       |              |              | 519        |             |              | 519           | 217         |             |             |            | 217          | 736          |               |
|                            | Stachybotryaceae      | <i>Myrothecium sp. 7C50</i>                 |              | 14           |            |             |              | 14            |             |             |             |            | 0            | 14           |               |
| Ascomycete sp. He1C        | Ascomycete sp. He1C   | <i>Ascomycete sp. He1C</i>                  | 11           |              |            | 31          |              | 42            |             |             |             |            | 0            | 42           |               |
| Ascomycete_unc             | Ascomycete_IS         | <i>Ascomycete_unc</i>                       |              |              |            |             |              | 0             | 1014        |             |             |            | 1014         | 1014         |               |
| <b>Basidiomycota</b>       |                       |                                             |              |              |            |             |              |               |             |             |             |            |              |              |               |
| Agaricomycetes             | Hydnaceae             | <i>Sistotrema resinicystidium</i>           |              |              |            |             |              | 0             | 463         |             |             |            | 463          | 463          |               |
| Basidiomycota_unc          | Basidiomycota_unc     | <i>Basidiomycota_unc</i>                    |              |              |            |             |              | 0             | 82          |             |             |            | 82           | 82           |               |
| Microbotryomycetes         | Sporobolomycetaceae   | <i>Bullera miyagiana</i>                    |              |              |            |             |              | 0             | 455         |             |             |            | 455          | 455          |               |
| Moniliellomycetes          | Moniliellaceae        | <i>Moniliella acetoabutans</i>              |              |              |            |             |              | 0             |             |             | 23          |            | 23           | 23           |               |
| Tremellomycetes            | Cuniculitremaeae      | <i>Kockovaella thailandica</i>              |              |              |            |             |              | 0             | 112         |             |             |            | 112          | 112          |               |
|                            | Tremellaceae          | <i>Cryptococcus aureus</i>                  |              |              |            |             |              | 0             | 129         |             |             |            | 129          | 129          |               |
|                            | Tremellales_IS        | <i>Tremellales_unc</i>                      |              |              |            |             |              | 0             | 3579        |             | 19          |            | 3599         | 3599         | 18            |
| <b>Chytridiomycota</b>     |                       |                                             |              |              |            |             |              |               |             |             |             |            |              |              |               |
| Chytridiomycetes           | Chytridiales_IS       | <i>Chytridiales_unc</i>                     |              |              |            |             |              | 0             |             |             | 12          |            | 12           | 12           |               |
|                            | Spizellomycetaceae    | <i>Rhizophlyctis rosea</i>                  |              |              |            |             |              | 0             |             |             | 22          |            | 22           | 22           |               |
|                            | Spizellomycetales_unc | <i>Spizellomycetales_unc</i>                |              |              |            |             |              | 0             | 148         |             | 633         |            | 781          | 781          |               |
| Chytridiomycota_unc        | Chytridiomycota_unc   | <i>Chytridiomycota_unc</i>                  |              |              | 73         | 9610        | 9683         | 9447          |             | 17          | 23980       |            | 33444        | 43127        | 8             |
| <b>Glomeromycota</b>       |                       |                                             |              |              |            |             |              |               |             |             |             |            |              |              |               |
| Archaeosporomycetes        | Ambisporaceae         | <i>Ambispora fennica</i>                    |              |              |            |             |              | 0             |             |             | 17          |            | 17           | 17           |               |

|                                             |                     |                                  |           |           |             |            |             |              |              |           |             |              |            |              |               |      |       |       |       |    |
|---------------------------------------------|---------------------|----------------------------------|-----------|-----------|-------------|------------|-------------|--------------|--------------|-----------|-------------|--------------|------------|--------------|---------------|------|-------|-------|-------|----|
| <b>Zygomycota</b>                           |                     |                                  |           |           |             |            |             |              |              |           |             |              |            |              |               |      |       |       |       |    |
| Entomophthoromycetes                        | Ancylistaceae       | <i>Conidiobolus brefeldianus</i> |           |           |             |            |             | 17           |              |           |             |              |            | 17           | 88            |      |       | 88    | 105   |    |
|                                             | Ancylistaceae       | <i>Conidiobolus coronatus</i>    |           |           |             |            |             |              |              |           |             |              |            | 0            | 252           |      |       | 252   | 252   |    |
| Cryptomycota Rozellidea                     | Rozellidea_LKM11_IS | <i>Rozellidea_LKM11_unc</i>      |           |           |             |            |             |              |              |           |             |              |            | 0            | 18051         | 9285 | 19706 | 47042 | 47042 | 7  |
| Other Fungi                                 | Fungi               | <i>Other fungi</i>               | 29        | 20        |             |            |             |              |              |           |             |              |            | 49           | 116           |      | 9     | 125   | 173   |    |
| <b>Total Fungi</b>                          |                     |                                  | <b>93</b> | <b>64</b> | <b>1204</b> | <b>141</b> | <b>9925</b> | <b>11427</b> | <b>41655</b> | <b>31</b> | <b>9404</b> | <b>44379</b> | <b>131</b> | <b>95600</b> | <b>107027</b> |      |       |       |       |    |
| <b>Opisthokonta Flagellates - Choanozoa</b> |                     |                                  |           |           |             |            |             |              |              |           |             |              |            |              |               |      |       |       |       |    |
| Choanoflagellata                            | Codonosigaceae      | <i>Monosiga_unc</i>              |           |           |             |            |             | 173          |              |           |             |              |            | 173          |               | 14   |       | 14    | 188   |    |
|                                             | Codonosigaceae      | <i>Monosiga ovata</i>            |           |           |             |            |             |              |              |           |             |              |            | 0            |               | 136  |       | 136   | 136   |    |
|                                             | Codonosigaceae      | <i>Sphaeroeca_unc</i>            |           |           |             |            |             | 2528         | 2528         |           |             |              |            |              |               |      |       | 0     | 2528  | 21 |
|                                             | Salpingoecidae      | <i>Salpingoecidae_unc</i>        | 17562     | 17180     | 136         |            |             |              | 34878        |           |             |              |            |              |               |      |       | 0     | 34878 | 9  |
|                                             | Choanoflagellata_IS | <i>Choanoflagellata_IS</i>       |           |           |             |            |             |              | 0            |           |             |              |            |              |               |      | 126   | 126   | 126   |    |
| Ichthyosporea                               | Pseudoperkinsidae   | <i>Ichthyophonida LKM51_unc</i>  | 4331      | 3328      | 71581       | 3126       | 11198       | 93564        | 12103        | 330       | 299         | 5140         | 157        | 18029        | 111593        |      |       |       | 4     |    |
|                                             | Pseudoperkinsidae   | <i>Pseudoperkinsidae_unc</i>     |           |           |             |            |             | 173          | 173          |           |             |              |            | 786          | 959           |      |       |       |       |    |
|                                             | Rhinosporideaceae   | <i>Rhinosporideaceae_uc</i>      |           |           |             |            |             | 479          | 479          |           |             |              |            | 0            | 479           |      |       |       |       |    |
| <b>Heterotrophic amoeba Cercozoa</b>        |                     |                                  |           |           |             |            |             |              |              |           |             |              |            |              |               |      |       |       |       |    |
| Granofilosea                                | Clathrulinidae      | <i>Hedriocystis_unc</i>          |           |           |             |            |             | 59           | 59           |           |             |              |            |              |               |      |       | 0     | 59    |    |
| <b>Protists</b>                             |                     |                                  |           |           |             |            |             |              |              |           |             |              |            |              |               |      |       |       |       |    |
| Bigyra - Bicoecea                           | Bicosoecaceae       | <i>uncultured bicosoecid</i>     |           |           |             |            |             | 100          | 100          |           |             |              |            |              |               |      |       | 0     | 100   |    |
| Cryptophyta Goniomonadaceae                 | Goniomonadidae      | <i>Goniomonas sp. SH-3</i>       |           |           |             |            |             |              |              |           |             | 341          |            |              |               |      |       | 341   | 341   |    |
| Cryptophyta Cryptophyceae                   | Cryptomonadaceae    | <i>Cryptomonas reflexa</i>       |           |           |             |            |             |              |              | 289       |             | 45           |            |              |               |      |       | 334   | 334   |    |
| Miozoa - Colponemea                         | Colponemidae        | <i>Colponema sp. Vietnam</i>     |           |           | 20          |            |             |              | 20           |           |             |              |            |              |               |      |       | 0     | 20    |    |
| <b>Plants and Green Algae</b>               |                     |                                  |           |           |             |            |             |              |              |           |             |              |            |              |               |      |       |       |       |    |
| Magnoliids                                  | Aristolochiaceae    | <i>Aristolochiaceae env samp</i> |           |           |             |            |             |              | 0            | 82        |             |              |            |              |               |      |       | 82    | 82    |    |
| Polypodiopsida                              | Dicksoniaceae       | <i>Dicksoniaceae env samp</i>    |           |           |             |            |             |              | 0            |           |             | 18           | 4          | 8            |               |      |       | 30    | 30    |    |
| Chlorophyceae                               | Dunaliellaceae      | <i>Polytomella</i>               | 4         | 4         | 52          |            |             |              | 60           |           | 14          |              |            | 20           |               |      |       | 34    | 94    |    |
