# Supplementary material for: Diverse microbial communities hosted by the model carnivorous pitcher plant Sarracenia purpurea: analysis of both bacterial and eukaryotic composition across distinct host plant populations
Source: PubMed Central journal article supplement (PMC6383556; doi:10.7717/peerj.6392), 2019-02-18
Supplement: peerj-07-6392-s001.pdf [file peerj-07-6392-s001.pdf]

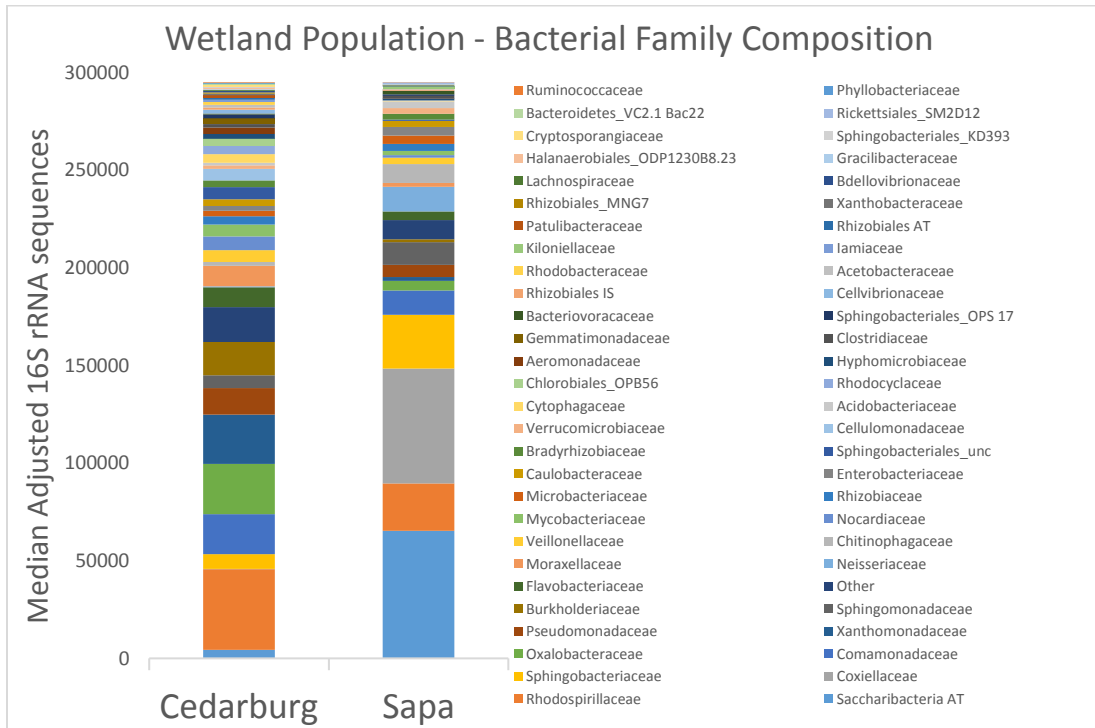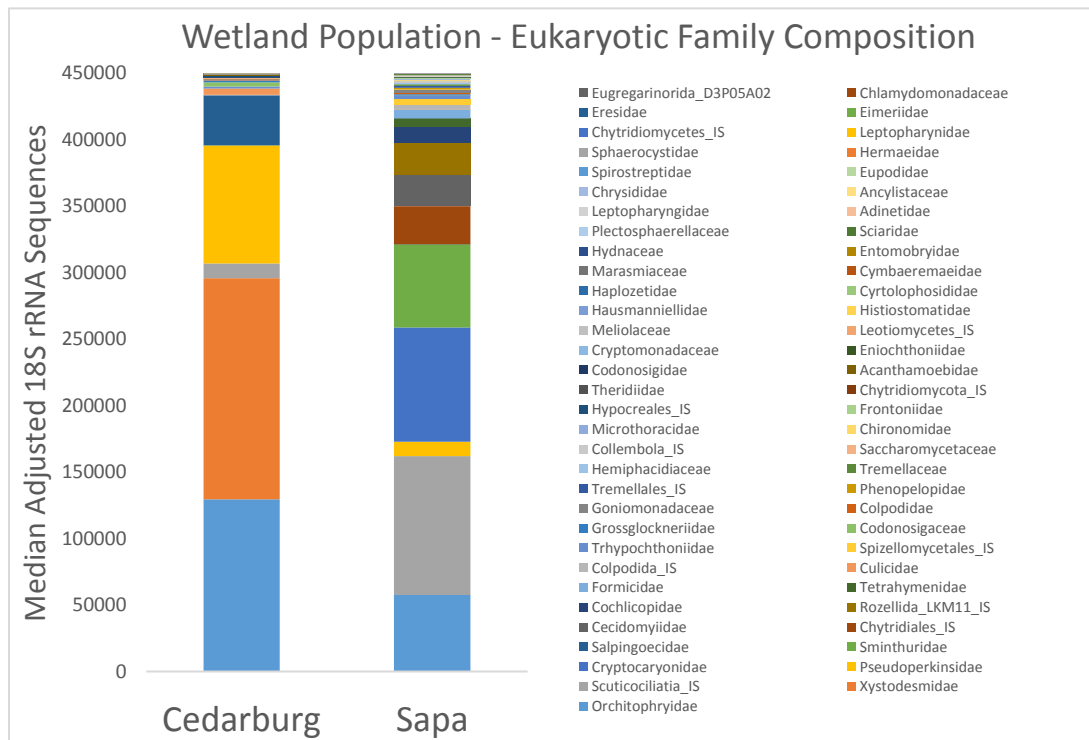

**Figure S1.** Comparison of community composition between the two wetlands populations, Cedarburg and Sapa. Bacterial (top) and Eukaryotic (bottom) families identified within pitcher samples, showing data pooled for the 5 samples from each wetland (shown in Fig. 1) for families representing > 0.01% of the total pooled sequences, and sequence numbers are adjusted to the mean of the two populations.
