# Supplementary material for: Diverse microbial communities hosted by the model carnivorous pitcher plant Sarracenia purpurea : analysis of both bacterial and eukaryotic composition across distinct host plant populations
Source: PeerJ journal article supplement (doi:10.7717/peerj.6392), 2019-02-18
Supplement: SupplementalFigure_S3.pdf [file SupplementalFigure_S3.pdf]

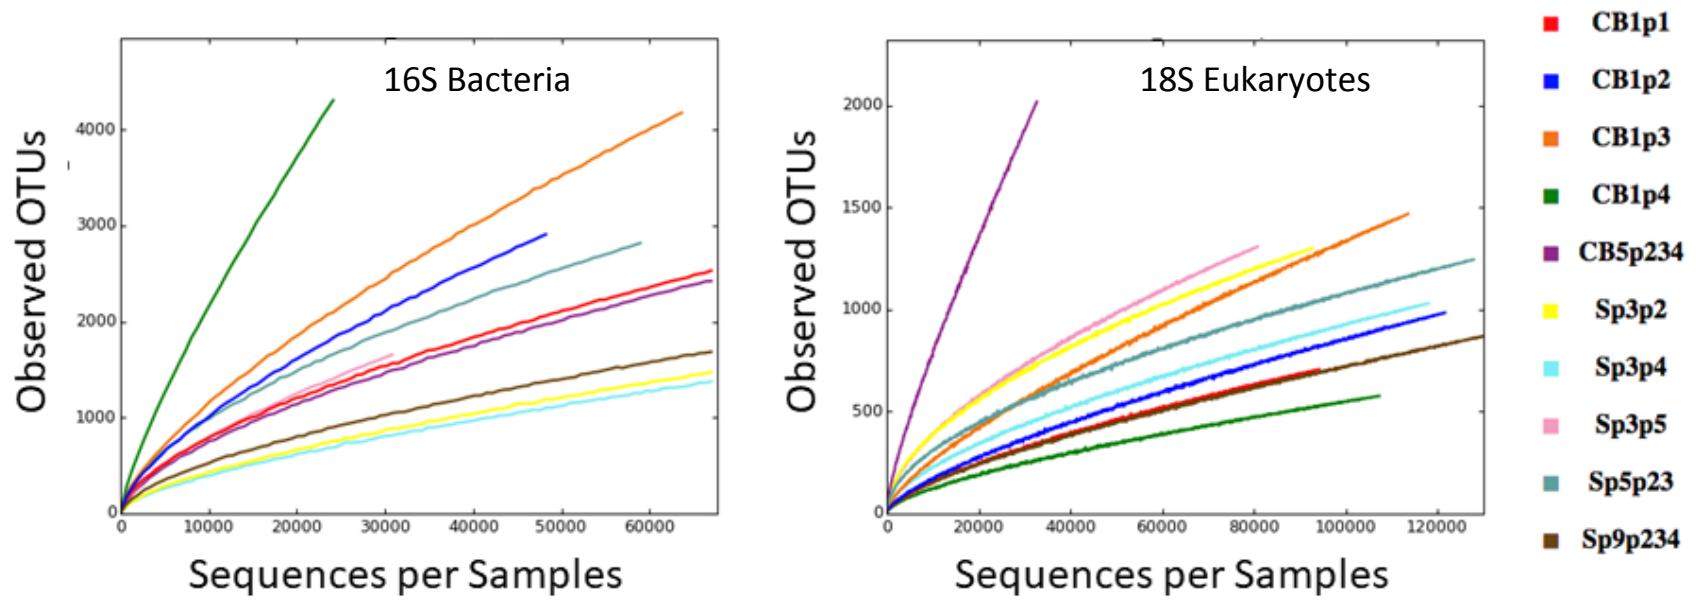

**Figure S3.** Rarefaction curve of OTUs identified in Cedarburg (CB) and Sapa (Sp) Bog pitcher samples based on sequencing of 16S rRNA (left) and 18S rRNA (right) genes.
